# “The glue produced by *Drosophila melanogaster* for pupa adhesion is universal”

Flora Borne<sup>1</sup>, Alexander Kovalev<sup>2</sup>, Stanislav Gorb<sup>2</sup>, Virginie Courtier-Orgogozo<sup>1</sup>

<sup>1</sup>Institut Jacques Monod, CNRS, Univ. de Paris, 75013 Paris, France.

<sup>2</sup>Department of Functional Morphology and Biomechanics, Zoological Institute of the University of Kiel, Kiel, Germany

corresponding authors: Alexander Kovalev: [akovalev@zoologie.uni-kiel.de](mailto:akovalev@zoologie.uni-kiel.de), Stanislav Gorb: [sgorb@zoologie.uni-kiel.de](mailto:sgorb@zoologie.uni-kiel.de), Virginie Courtier-Orgogozo: [virginie.courtier@normalesup.org](mailto:virginie.courtier@normalesup.org).

## ABSTRACT

Insects produce a variety of adhesives for diverse functions such as locomotion, mating, egg or pupal anchorage to substrates. Although they are important for the biology of organisms and potentially represent a great resource for developing new materials, insect adhesives have been little studied so far. Here, we examined the adhesive properties of the larval glue of *D. melanogaster*. This glue is made of glycosylated proteins and allows the animal to adhere to a substrate during metamorphosis. We designed an adhesion test to measure the pull-off force required to detach a pupa from a substrate and to evaluate the contact area covered by the glue. We found that the pupa adheres with similar forces to a variety of substrates (with distinct roughness, hydrophilic and charge properties). We obtained an average pull-off force of 217 mN, corresponding to 15 500 times the weight of a pupa and adhesion strength of 137-244 kPa. Surprisingly, the pull-off forces did not depend on the contact area. Our study paves the way for a genetic dissection of the components of *Drosophila melanogaster* glue that confer its particular adhesive properties.

(184 words, max 250 words)

**Abbreviations.** PLL: Poly-L-Lysine, PLL-PEG: Poly-L-Lysine-Polyethyl glycol, SEM: Scanning Electron Microscopy

**Keywords.** Bioadhesion, *Drosophila*, insect, attachment, adhesion assay

## INTRODUCTION

Natural adhesives have a very important significance for the biology of organisms and are a great material for innovation of biologically-inspired technical adhesives. The most studied bioadhesives are from marine organisms, mussels and barnacles (Power et al., 2010), and they are now used in a variety of biomimetic applications such as surgical sealants to repair tissues or synthetic polymer coatings (Lee et al., 2011). Bioadhesives in insects are less studied although they are extremely diverse (Gorb, 2001; Graham, 2008; Li et al., 2008; Betz, 2010). Some insects produce glue to secure their eggs or cocoon (Betz, 2010). A few studies have been carried out on egg glue composition and particularly on the glue adhesive strength in different insect species. For example, in *Opodiphthera* moths, females secrete a viscous fluid from their accessory reproductive gland that sticks their eggs to each other and to the substratum. This hydrogel-type glue is highly elastic and mainly made of proteins. The shear strength reaches 1-2 MPa on wood, which could potentially be enough for some industrial applications (Li et al., 2008). Furthermore, these eggs and eggs from other species such as *Crioceris asparagi* have the ability to attach to plants covered with crystalline epicuticular waxes known to be non-adhesive (Voigt and Gorb, 2010). Similar properties have been revealed in the egg glue of codling moth (Al Bitar et al., 2012; 2014). Thus, investigating the glue of various insect species appears to be a great strategy to find novel universal and substrate-specific adhesives. Surprisingly, although *Drosophila melanogaster* is a model organism that is extensively used in laboratories, little is known about pupal adhesion in this species.

*Drosophila melanogaster* larvae secrete a glue from their salivary glands right before pupariation (Fraenkel and Brookes, 1953). After expectoration, following larval peristaltic movements, the secreted liquid spreads between the body and the substrate and dries within a few minutes (Beňová-Liszeková et al., 2019). This glue allows the animal to stay firmly attached to an external surface for several days, until the adult fly emerges from the pupal case, while the pupal case remains attached to the substrate. The pupa of other Brachycera fly species is also often attached to a substrate during metamorphosis (Fraenkel and Brookes, 1953).

In the wild, *Drosophila* pupae have been reported to adhere to a great variety of substrates from fruits to beer bottles (Voudibio et al., 1989) and in diverse environments. Particularly, pupae have been observed on dry parts of various fruits, some species have also been found fixed to wood, wet rotten parts of fruits, deep in the soil and to one another (Grossfield, 1978; Sokolowski, 1985; Vandal et al., 2008; Beltramí et al., 2010; Castillo et al., 2014). Pupal attachment might be important for not being taken away by predators, to resist environmental conditions (wind or rain) or to help adult flies emerge from the pupal case after metamorphosis (Da Lage et al., 2019).

In *D. melanogaster* (Korge, 1975; 1977) and other *Drosophila* species (*D. virilis* (Kress, 1982), *D. natusa* (Ramesh and Kalisch, 1988), *D. gibberosa* (Shirk et al., 1988)), the glue is composed of a small number of proteins called salivary gland secreted (Sgs) proteins. These proteins present repeated motifs and glycosylations, which are commonly found in adhesive proteins (Graham, 2008; Betz, 2010). Some of the *Drosophila* glue proteins are rich in cysteine, like many marine adhesive proteins and this property could be important to maintain a secondary structure by forming disulfide bonds (Graham, 2008). Other *Drosophila* glue proteins are rich in serine and threonine and highly O-glycosylated, suggesting that they may interact with water to hydrate or dehydrate the glue (Farkaš, 2016). The *Sgs* genes have evolved rapidly between species and within species (Korge, 1975; 1977; Beckendorf and Kafatos, 1976; Da Lage et al., 2019).

Here, we investigated the adhesive properties of the glue of *D. melanogaster* on different substrates. First, we analyzed the contact region between the pupa and the surface to which it is attached. Then, we designed a pull-off force measurement set up. We assessed the force required to detach the pupa from different substrates, with different hydrophilic and charge properties or with different roughnesses, and analyzed the way rupture occurs.

## METHODS

### Flies

*D. melanogaster* Canton S flies (gift from Roger Karess) were cultured in plastic vials on standard medium (1L: 62.5 g yeast, 62.5 g cornmeal, 10.0 g agar-agar, 20.0 g glucose monohydrate, 30.0 g molasse, 30.0 g sugar beet syrup, 10.0 ml propionic acid (10%), nipagin (10%)) at room temperature.

### Larva preparation

Third instar wandering larvae were washed in PBS to remove traces of food and microorganisms from their surface, put in empty Petri dishes with a paintbrush and kept in high humidity atmosphere at room temperature in a closed plastic box (15x10x5 cm) containing wet cotton. When larvae stopped moving, they were transferred on the substrate of interest with soft forceps, kept at high humidity as mentioned above and let to pupariate. Five to 24 h after transfer to the substrate of interest, the substrate with pupae attached to it was put for 1 h at room humidity to allow the glue to dry completely and then the pupae were used for adhesion assays. Pupae not used for assays were

weighed individually using Mettler Toledo AG203 (DeltaRange®, Gießen, Germany). Temperature, humidity and atmospheric pressure were monitored daily.

### **Preparation of glass and Teflon substrates**

Two types of non-coated microscopic glass slides were used to measure adhesion on glass: Menzel Superfrost microscope glass slide from ThermoScientific™ (#AGAB000080) and microscopic glass slide from Roth (#0656.1). Atmospheric plasma-treated glass slides were prepared using a PlasmaBeam (Diener electronic GmbH, Ebhausen, Germany) on Roth glass slides for 1 min. To prepare Poly-L-Lysine-Polyethyl glycol-coated (PLL-PEG-coated) glass slides, Roth glass slides were cleaned with a plasma cleaner then coated with 0.1 mg·ml<sup>-1</sup> non-biofunctionalized PEG side-chains (methoxy-terminated) (SuSos). Poly-L-Lysine-coated (PLL-coated) glass slides from Thermo Scientific™ (J2800AMNZ) and pieces of Teflon (Polytetrafluorethylen, Kelux, Geldern, Germany) were also tested.

### **Preparation of Spurr epoxy resin substrates**

First, a silicone cast was made by pouring polyvinylsiloxane (light body Affinis, Coltène/Whaledent GmbH + Co. KG, Langenau, Germany) over a cleaned Roth glass slide (to create the smooth resin, Ra=80 nm (Salerno et al., 2014)) or over glass slides covered by polished papers with different grain sizes: 1 µm and 9 µm (Ra=0.54 and 2.47 µm measured over 1400x1050 µm area using NewView 6k (Zygo, Middlefield, CT, USA) white light interferometer; both with FiberMet Abrasive disks, Buehler) (Salerno et al., 2014), P1000 and P80 (Ra=3.94 and 40.40 µm measured over the same area using VR 3100 (Keyence, Neu-Isenburg, Germany) 3D profilometer; polishing papers, Bahauss). After a couple of minutes, the slide and the polished paper were removed and the edges of the polyvinylsiloxane cast were made higher. Then, Spurr epoxy resin (Spurr, 1969) was poured into the polyvinylsiloxane cast and polymerized at 65 °C overnight in Memmert U 15 oven (Schwabach, Germany). Resin was then allowed to cool down for a couple of hours before unmolding. Each resin was used for several assays.

### **Contact angle measurements**

Water contact angles on different substrate surfaces were measured using a contact angle measurement device OCA20 (DataPhysics Instruments, Filderstadt, Germany). A 2-µl water droplet was deposited on a substrate, then an image of the droplet was taken after five seconds, and contact angles were determined from the fit of the droplets shape with a sphere using SCA 202 software

131 (DataPhysics Instruments, Filderstadt, Germany). All the contact angle measurements were done  
132 before the pull-off force assays except for PLL-PEG-coated glass.

133

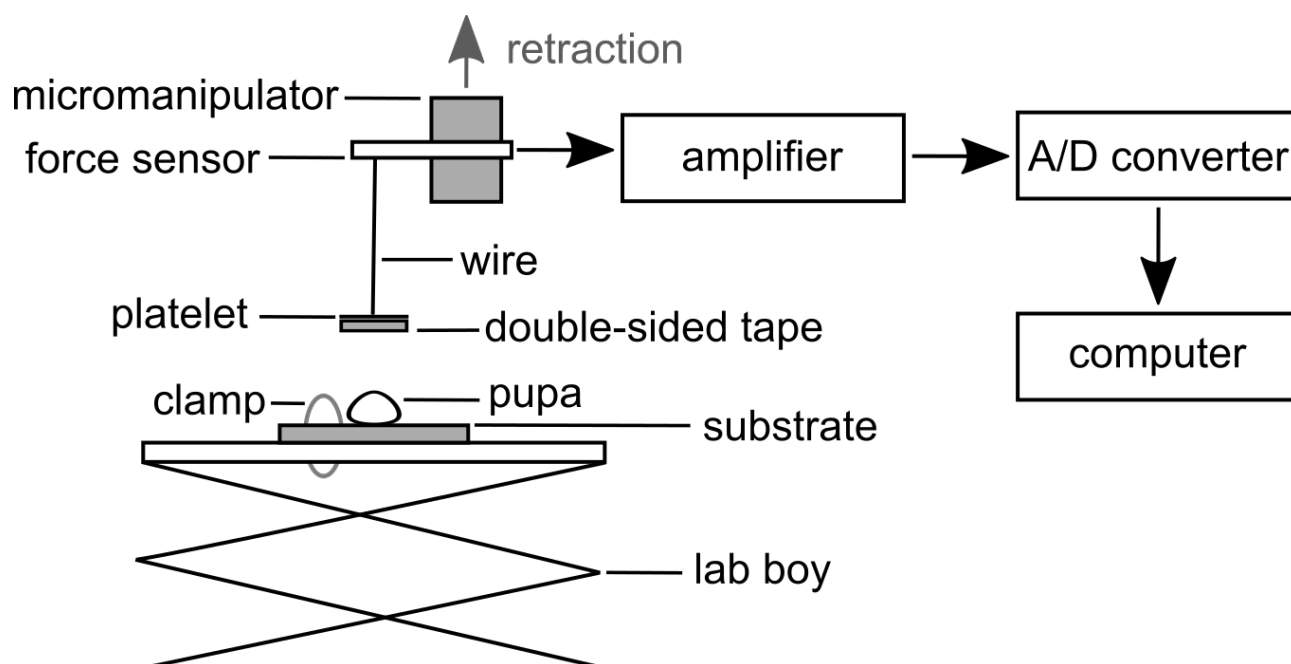

134

135 **Figure 1. Experimental set-up for measuring adhesion force of individual *Drosophila***  
136 ***melanogaster* pupae.** The substrate on which the pupa was naturally sticking was fixed on a lab  
137 boy using a clamp and brought into contact with a piece of double-sided sticky tape attached to a  
138 metal platelet. To detach the pupa from the substrate, a force sensor linked to the platelet by a metal  
139 wire was moved up using a motorized micromanipulator. The time-force sensor signal was  
140 amplified and converted before being processed in a computer.

141

## 142 **Adhesion force measurement**

143 To measure pupal adhesion, a force transducer (100 g capacity, FORT100, World Precision  
144 Instruments, Sarasota, FL, USA) mounted on a motorized 3D micromanipulator (DC3001R, World  
145 Precision Instruments, Sarasota, FL, USA) was used (Fig. 1). The substrate was horizontally  
146 clamped to a lab boy. A piece of aluminum platelet of 1.0 x 2.0 x 0.2 mm attached to the force  
147 transducer by a metal wire (0.1 mm) was covered by a piece of double-sided adhesive tape (tesa,  
148 extra strong, #05681-00018). A new piece of tape was glued for each measurement. Only pupae  
149 attached on their ventral side and which did not contact other pupae were used for measurements.  
150 The tape on aluminum platelet was brought into contact with the dorsal part of the pupa by  
151 adjusting manually the height of the lab boy. The force transducer was then moved upwards with a  
152 velocity of 200  $\mu\text{m/s}$  until detachment of the pupa. The signal from the force transducer was

153 amplified using Transbridge TBM4M and digitized using Lab-Trax-4 data acquisition hardware  
154 (WPI, Sarasota, FL, USA). Three phases could be distinguished on force curves recorded using  
155 LabScribe v3 (iWorks, Dover, NH, USA) (Fig. 2A). During the initial phase, the pupa was not  
156 attached to the tape and force with no pupa weight was measured. The pulling phase started when  
157 the pupa came into contact with the tape. During this phase, the pupa was stretched until it detaches  
158 from the substrate (maximal force). Finally, during the resting phase, the force went down to a basal  
159 value including pupal weight. The set up was calibrated before the first assay with a standard  
160 weight. Pull-off force corresponding to the force at pupa detachment was calculated as the  
161 difference between the maximal pulling force and the mean force at the initial phase (offset). The  
162 force corresponding to the adjustment of the lab boy until pupa glued to the tape between the initial  
163 phase and the pulling phase was not recorded.

164 328 pupae were measured using our pull-off force measurement set up. In 59 (17%) cases,  
165 the pupal case cracked on the dorsal side between the head and the thorax during the pulling  
166 process. For 36 (11%) of them, the pupal case covering the ventral part of the head detached from  
167 the rest of the pupal case and remained glued to the substrate at the end of the trial, while the  
168 complete pupa body was detached together with the posterior part of the pupal case. For the 23  
169 (7%) other cases, the whole animal together with the broken pupal case were detached from the  
170 substrate. These 59 (18%) cases were excluded from further analysis. Furthermore, two or more  
171 trials were sometimes necessary to detach a pupa, when the connection between the double-sided  
172 tape and the pupa failed. If the maximal force on the last trial was higher than the previous ones  
173 (Fig. 2E), the last trial was used for analysis unless the pupal case was damaged. If the maximal  
174 force was higher in one of the first trials, the measurement was excluded, suggesting that the pupa  
175 has been partly detached during the first trials (n=23 (7%), Fig. 2F). 11 other cases (3%) were  
176 excluded from the analysis: imperfections in the substrates (n=3), pupa not attached ventrally (n=6),  
177 pupa not attached, with no glue (n=1) and tape glued to the substrate (n=1). In total, 93 cases (28%)  
178 were excluded.

179 We then organized the remaining 235 cases (100%) into four groups. The first group gathers  
180 the trials for which the whole pupa detached at once and the tape stayed well fixed to the pupa  
181 (n=56 (24%), Fig. 2A). The second group gathers the trials for which the piece of tape started to  
182 peel from the pupal case surface during the pulling process and pupa detached at once. For this  
183 group, the force-time curve had a negative derivative at some point during the pulling phase (n=  
184 106 (45%), Fig. 2B). The third group gathers the trials for which the whole pupa did not detach at  
185 once but the head part stayed attached longer than the rest of the body. In such cases, two peaks

were observed on the force-time curve (n=29 (12%), Fig. 2C): the first one corresponds to the main body part detachment and the second one to the head part detachment. The first peak always displayed the maximal force. Finally, the fourth group gathers the trials for which tape started to peel before pupa detachment and for which the whole pupae did not detach at once. For this group, the force-time curve had a negative derivative at some point during the pulling phase and a second peak was observed after the peak corresponding to the maximal force (n=44 (19%), Fig. 2D).

We tested if these four groups having different detachment behavior have an effect on the resulting adhesion force. We performed a two-way ANOVA considering force as the dependent variable. We found that substrates but not groups had a significant impact on pupa adhesion force and that there was no significant interaction between groups and substrates (substrate:  $F=12.86$ ,  $P<2e-16$ , group and interaction group-substrate:  $P<0.05$ ).



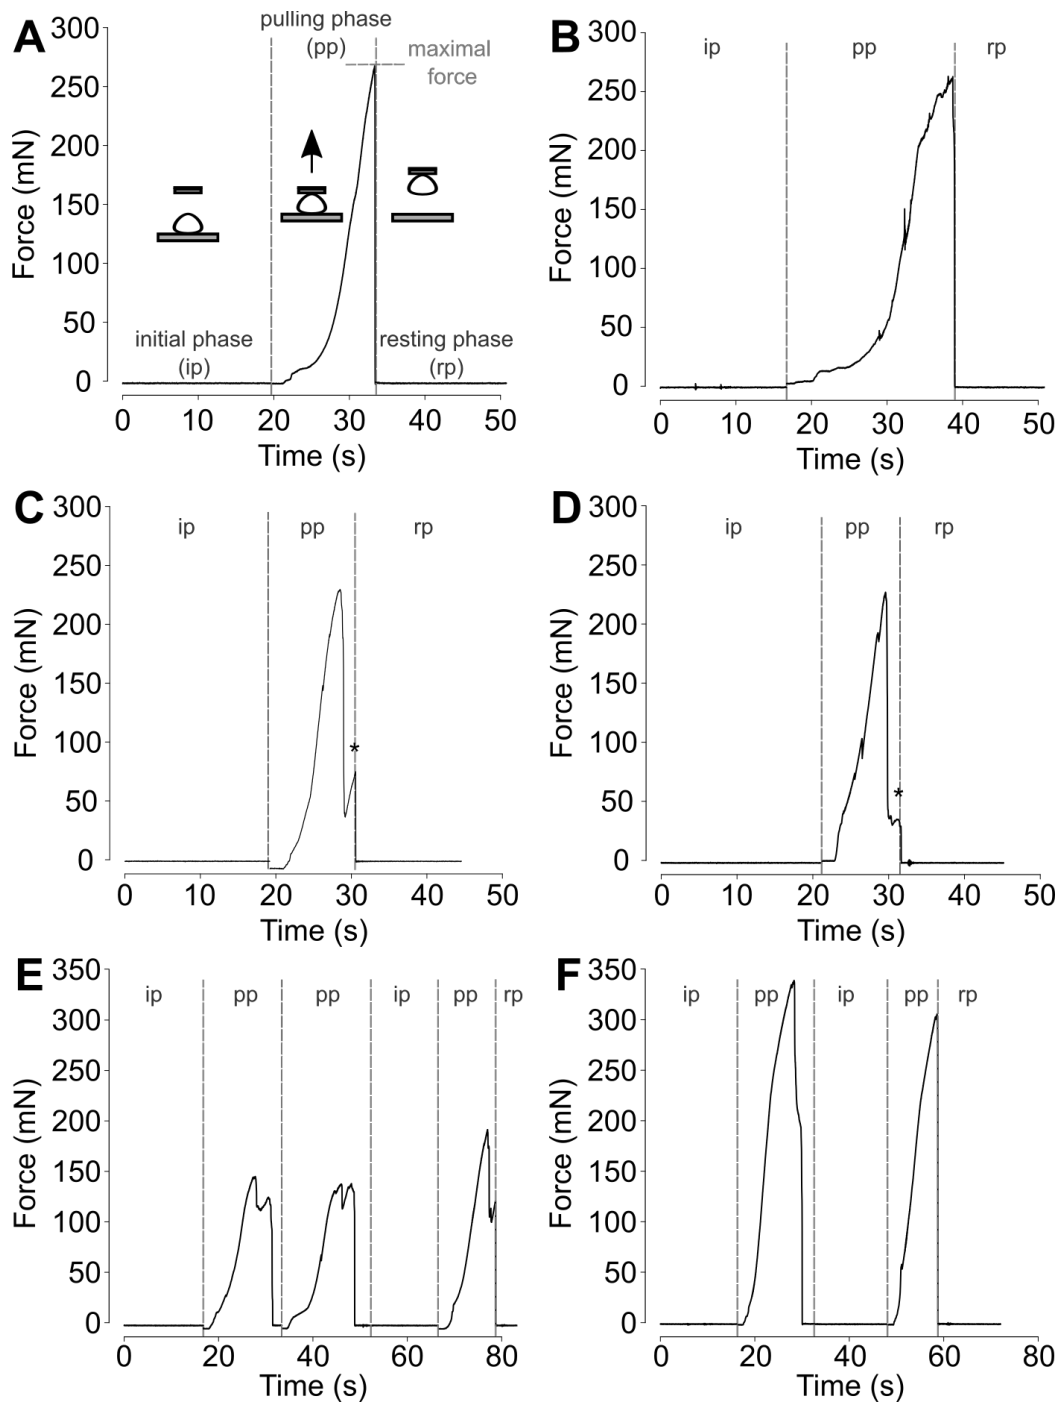

219

220 **Figure 2. Representative force-time curves obtained in pull-off force measurements.** (A) Force-  
221 time curve consists of three phases: the initial phase (ip) corresponding to the force before pupa is  
222 attached to the tape, the pulling phase (pp) from the time the pupa is attached to the tape to the  
223 maximal force, and the resting phase (rp) after detachment. The maximal force corresponds to the  
224 force at pupa detachment. Force-time curve corresponding to the attachment of the pupa to the tape  
225 (between initial phase and pulling phase) is not shown. Every phase is separated with a vertical dot  
226 line. Representative curves of the following cases are shown: (A) the tape does not peel from the



pupa during the pulling phase and the pupa is detached at once, **(B)** the tape peels from the pupa during the pulling phase and at the end the pupa is detached at once, **(C)** first the posterior part and then the head of the pupa are detaching. Head detachment produces a small peak on the curve (marked with a star), **(D)** the tape peels from the pupa, then the posterior part of the pupa first detaches and then the head of the pupa detaches (marked with a star), **(E)** the tape detaches from the pupa twice and then the pupa detaches from the substrate at the third trial, maximal force is observed during pupa detachment **(F)** tape detaches from pupa once and pupa detaches from the substrate at the second trial, maximal force is observed during tape detachment from the pupa.

## Microscopy

After pupal detachment, images of glue prints remaining on glass substrates (100 cases) were taken with a Keyence VR 3100 microscope at x40 or x80. Prints areas were measured manually using imageJ (1.50d, java 1.8.0\_212, 64-bit). For 1 case, prints were altered before the picture and areas could not be measured. For 11 cases, the red area could not be visualized and was not measured.

One pupa detached from Menzel non-coated glass slide was mounted on aluminum stubs by using double-sided carbon conductive tape (Plano, Wetzlar, Germany). The sample was frozen in liquid nitrogen, sputter-coated with gold-palladium (8 nm thickness) at -140°C, and examined in a cryo-SEM (Hitachi S-4800; Hitachi Ltd., Tokyo, Japan) at -120°C and an accelerating voltage of 3 kV.

## Statistical analysis

Statistical differences in pull-off forces between substrates, groups and interactions were tested by two-way ANOVA using R *aov* function (R version 3.4.4, Team, 2013). Statistical differences in pull-force between substrates were tested by one-way ANOVA with the same R *aov* function followed by multiple pairwise comparison tests using Tukey test with R *TukeyHSD* function. Pearson correlation between pull-off force and contact areas were tested using R *lm* function. Effect of humidity, temperature, pressure and age were also tested using R *lm* function.

## 260 RESULTS

### 261 Morphology of the glue

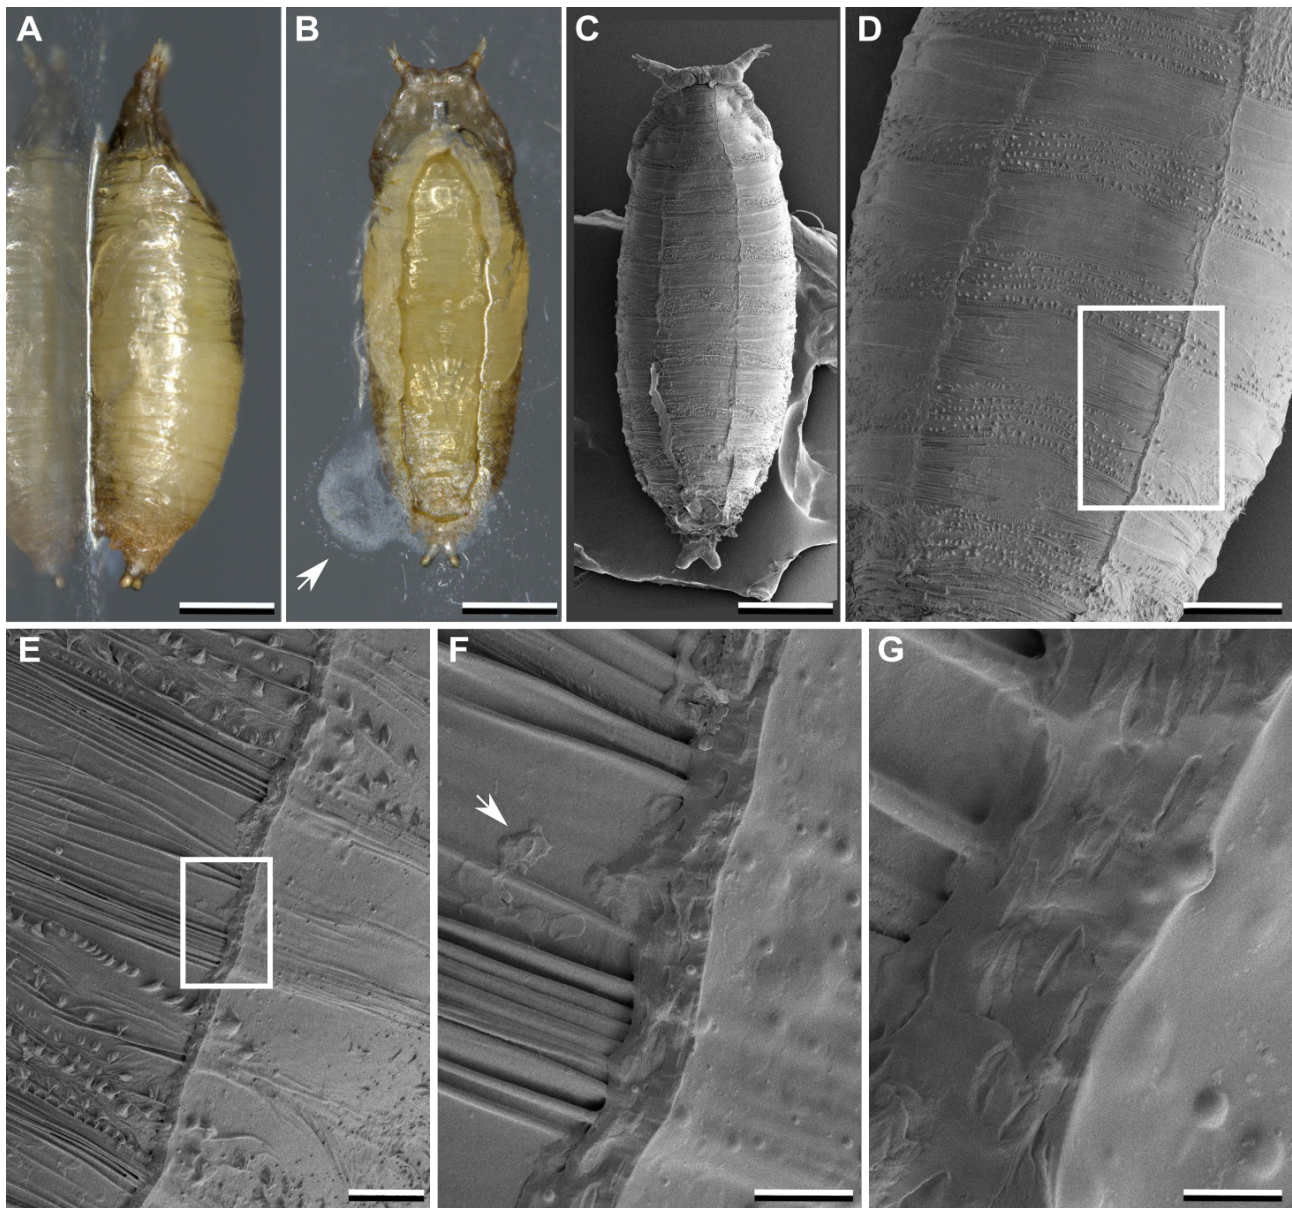

262  
263 **Figure 3. Morphology of *Drosophila melanogaster* glue.** (A,B) Pupa naturally attached to a glass  
264 slide viewed from the side (A) and ventrally (B). Glue at the posterior part of the animal sometimes  
265 forms a plug on the substrate (B, arrow). (C-G) Cryo-SEM micrographs of a pupa after detachment  
266 from a glass slide. The white squares in (D) and (E) indicate respectively the location of the images  
267 (E) and (F). After detachment, glue is not present on the former contact area on the ventral side  
268 except thin traces (F, arrow) and remains on the sides of the ventral part. Scale bars: (A-C) 500  $\mu$ m,  
269 (D) 250  $\mu$ m, (E) 50  $\mu$ m, (F) 20  $\mu$ m. (G) 5  $\mu$ m.

Pupae of *D. melanogaster* attach naturally to substrates on their ventral side via a layer of glue which forms an oval-shaped patch visible on glass slides of approximately 2 mm length and 0.5 mm width (Fig. 3A-B). Glue near the posterior part of the animal usually forms a bigger plug that can spread on the substrate (arrow, Fig. 3B). SEM observations of pupae detached from non-coated glass slides show that sometimes only thin traces of glue remain on the former contact area (Fig. 3C-G arrow in Fig. 3F). The glue layer covering the pupal case appears to be organized in thin layers (Fig. 3F-G). Air bubbles are observed between the layers and the glue does not fill all the asperities of the cuticle surface (Fig. 3I-J).

### **Pupal adhesion on different substrates**

We performed pull-off force measurements using pupae naturally attached to 11 different substrates: non-coated glass (from Roth and from Menzel), PLL-coated glass, PLL-PEG-coated glass, oxygen-activated glass, Teflon, and Spurr epoxy resin with 5 different roughnesses. We measured the contact angle of these 11 substrates (Table S2). Contact angle values ranged from 11° (highly hydrophilic substrate) to 112° (highly hydrophobic substrate). In total, 328 pupae were measured. We excluded 93 cases for which adhesion measures were not reliable, for instance when the pupal case was damaged during the assay or when several trials with the same pupa disrupted its adhesion (see Methods).

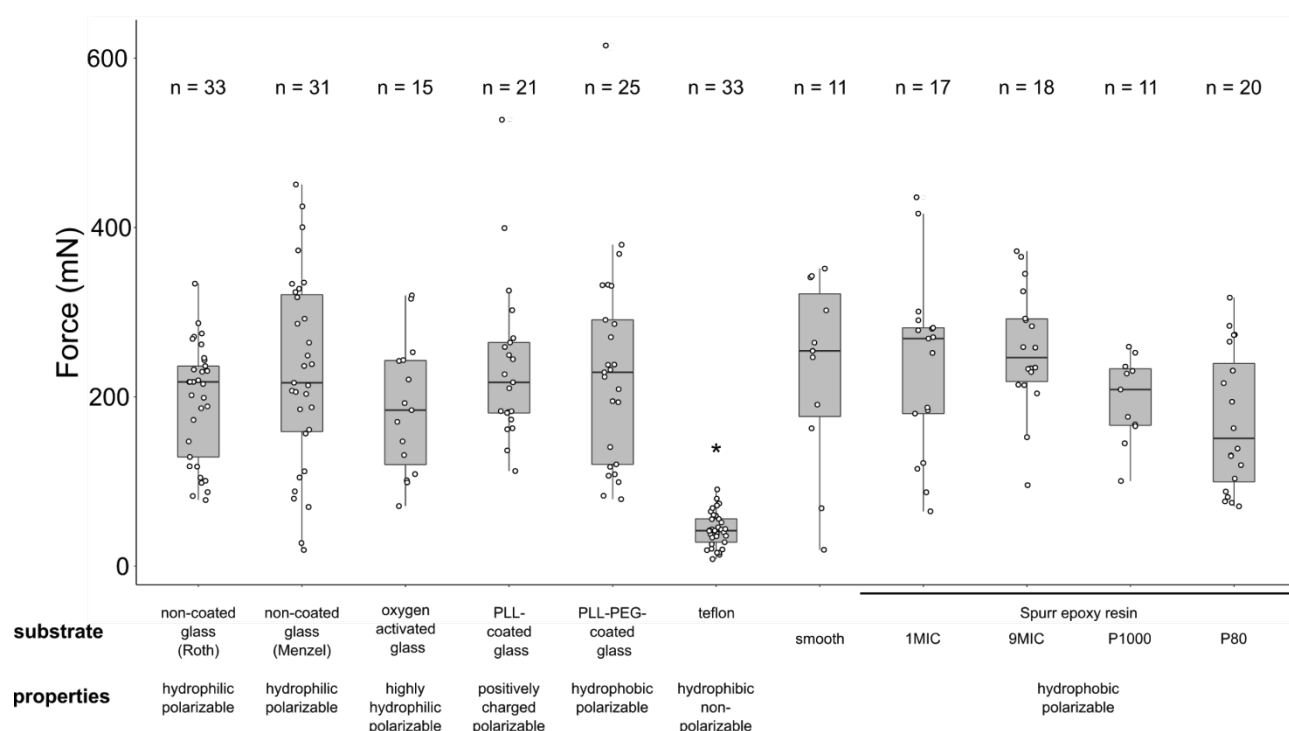

**Figure 4. Force required to pull-off pupae from different substrates.** Each dot corresponds to a single pupa and n indicates the total number of pupae tested for each surface. Ends of the boxes define the first and third quartiles. The black horizontal line represents the median. The vertical line on the top of the box extends to the largest value no further than  $1.5 \times \text{IQR}$  from the upper hinge of the box. The vertical line on the bottom of the box extends to the smallest value at most  $1.5 \times \text{IQR}$  of the hinge. (IQR: inter-quartile range is the distance between the first and the third quartiles). Data beyond the end of these lines are "outlying" points. Asterisks indicate significant difference ( $P < 0.001$ ) between Teflon and all the other substrates.

Medians of the pull-off forces on glass-substrates (non-coated, PLL-coated, PLL-PEG-coated and oxygen-activated glass) ranged from 184 mN (oxygen-activated glass,  $\text{SD} = 78$ ) to 229 mN (PLL-PEG-coated glass,  $\text{SD} = 122$ ) while for Teflon, force was 42 mN ( $\text{SD} = 20$ ) (Fig. 4). Only pull-off force on Teflon was significantly different from forces obtained on other substrates (one-way ANOVA  $F = 12.92$ ,  $P < 2e-16$ , followed by all pairwise comparison Tukey-Test,  $P < 0.001$  for all comparisons with Teflon). Similarly, pull-off force medians on resin with different roughnesses ranged from 151 mN (P80,  $\text{SD} = 82$ ) to 269 mN (1MIC,  $\text{SD} = 105$ ) and no statistical differences were found (from same ANOVA and Tukey tests). During our assays, the ranges for humidity, temperature, pressure and age of pupa were the following: 34.4 - 58.8 %, 23.5 - 27.9 °C, 1005 - 1026 mb, 3.5 - 23 h after deposition of the wandering L3 larva on the substrate. No effect of

humidity, temperature, pressure and age of pupa was found (multiple linear regression with force as dependent variable and substrate, humidity, pressure, age as independent variables).

In conclusion, we found that the pull-off force is independent of substrate surface chemistry (except Teflon) and of roughness in wide range (80 nm – 40.40  $\mu\text{m}$ ).



# 356 The glue-substrate interface

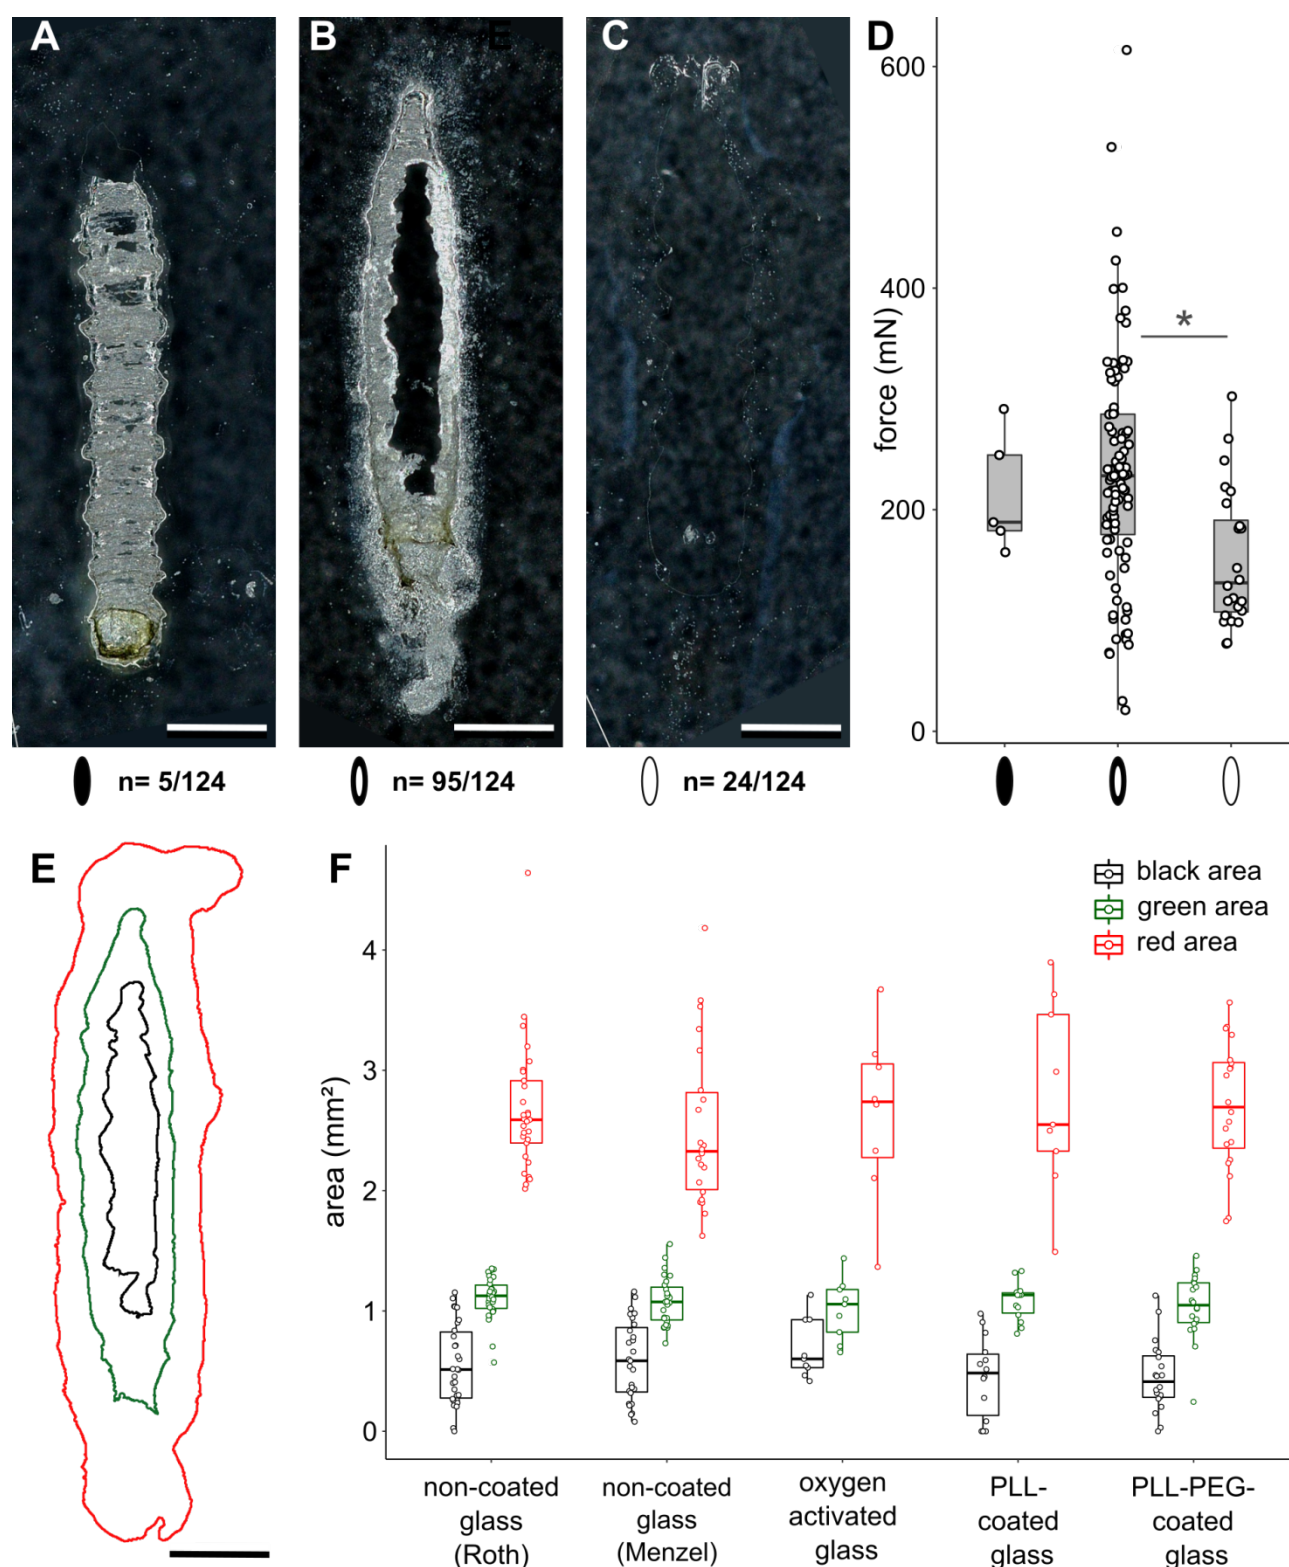

357  
358 **Figure 5. Glue-substrate interface on glass-type substrates. (A-C)** Examples of typical glue  
359 prints obtained after pull-off force assays on glass-type substrates: **(A,C)** PLL-coated glass, **(B)**  
360 non-coated glass (Roth). Three cases are defined: **(A)** when the glue fully remained on the substrate,

361 represented as a black oval, **(B)** when the glue partly detached from the substrate, represented as a  
 362 white oval with thick black contour, **(C)** when the glue completely went off from the substrate,  
 363 represented as a white oval. **n** indicates the total number of glue prints obtained for each case. **(D)**  
 364 Box plots representing the force required to detach pupae depending on the print types defined in  
 365 **(A-C)**. One dot corresponds to a single pupa. Asterisk indicates significant difference ( $P < 0.05$ )  
 366 between cases where the glue partly detached from the substrate and cases where the glue  
 367 completely went off from the substrate. **(E)** Scheme of the various glue prints with the glue-pupa  
 368 interface delimited in green, the glue-glass interface delimited in red and the border of the glue  
 369 removed from the glass after pull-off adhesion test in black. **(F)** Box plots showing the size of the  
 370 three areas defined in **(E)** for the five glass-substrates. Only prints where the glue fully remained  
 371 and partly detached from the substrates were analyzed (see Methods). Scale bars: **(A-C,E)** 500  $\mu\text{m}$ .  
 372 Box plots are defined as previously (Fig. 4).

373  
 374 After pull-off force measurements, glue prints were analyzed for the five glass-type substrates. For  
 375 these substrates, three types of prints can be defined: (1) the glue fully remained on the substrate  
 376 (Fig. 5A), (2) the glue partly detached from the substrate (Fig. 5B) or (3) the glue went off  
 377 completely with the pupa (Fig. 5C). Most of the time, the glue was partly detached from the  
 378 substrate ( $n = 95/124$ ). For the five glass-type substrates, print types (but not substrate types) have a  
 379 significant impact on pupa adhesion (two-way ANOVA, print types:  $F = 5.6$ ,  $P = 0.0013$ ). When the  
 380 glue completely went off with the pupa, corresponding pull-off force was significantly lower than  
 381 force obtained when glue was partly detached (134 mN,  $SD = 62$  compared to 231 mN,  $SD = 102$ ,  
 382 Tukey test  $P < 0.05$ ) (Fig. 5D). On Teflon, the glue always went off with the pupa ( $n = 33/33$ ).

383 Furthermore, from the glue print three distinct areas can be defined. The pupa-substrate  
 384 interface area corresponds to the area where the pupa was in contact with the substrate (green  
 385 outline in Fig. 5E). The glue-substrate interface area (red outline in Fig. 5E) corresponds to the total  
 386 surface of the substrate covered by the glue. After pupa detachment, a third area where glue went  
 387 away with the pupa can be defined (black outline in Fig. 5E). For all cases (as in Fig. 5A,B) where  
 388 the glue did not go off completely with the pupa, the three areas were measured from the print  
 389 images of the five glass-type substrates. A relatively high variation in glue-substrate interface area  
 390 was observed (from 1.3 to 4.6  $\text{mm}^2$ ) compared to the pupa-substrate area which was relatively  
 391 invariant, around 0.2 to 1.5  $\text{mm}^2$  (Fig. 5F). No difference was found in areas between substrates  
 392 (one-way ANOVA for each area,  $P > 0.05$ ) (Fig. 5F). No correlation was found between pull-off



force and any of the three areas when combining the five substrates or when testing each substrate individually (linear regression for each area,  $P > 0.05$ ) (Fig. S1).

## DISCUSSION

*Drosophila* glue spreads over an external substrate and sticks the pupa's ventral part to the substrate, forming an oval-shaped interface (Fig. 3B). From SEM images, we observed flat holes that seem to correspond to air bubbles that were trapped between different layers of glue. Several layers may have been deposited successively on the surface of the pupa by the back and forth movements of the larvae during expectoration (Fraenkel and Brookes, 1953). The presence of bubbles and the fact that the glue does not fill all the asperities of the cuticles suggest that the glue is relatively viscous when it comes out. It is known that the glue is produced by the salivary glands and is secreted by the mouth (Fraenkel and Brookes, 1953). However, on the glue prints we sometimes observed a plug around the posterior tip of the larva (Fig. 3B). Recently, Benova-Liszekova et al. (2019) reported that a few larvae did not empty their guts entirely before pupariation. One possibility is that this plug might be a posterior secretion from the digestive tube, which mixes with the anteriorly secreted glue.

During our pull-off force assays, the piece of tape used to stick the pupa in order to pull it peeled out from the pupal case in 153 of the 235 analysed cases, meaning that the adhesion strength between the double-sided tape and the pupal case is close to the adhesion strength between the glue and the pupa. In our experiments, the tape thus adheres to the pupal case just enough for pupa glue measurements. Furthermore, in 76/235 cases, the posterior part of the animal first detached from the substrate before the head detached. In these cases, the pull-off force was probably not applied exactly at the center of the pupa but more posteriorly due to the asymmetrical shape of the pupa. Glue concentration and quantity may also be higher around the mouth, from which it is secreted. Furthermore, the pupal case is more fragile around the puparial opercular seam, a seam which runs across the front of the puparium and extends along the sides, and which will break when the adult will hatch (Tyler, 1994). In addition, when using forceps to extract the animal from its pupal case, the pupal case generally splits into annular strips (Held, 1992). The zone of breakage that we observed on the pupal case in our pull-off assays therefore corresponds to the most fragile region of the pupal case.

In any case, no significant difference was found between cases for which pupae detached at once and cases where the posterior part detached before the head part. This suggests that stronger head adhesion does not affect the maximal pull-off force.

426 Pull-off forces required to detach pupae from substrates other than Teflon ranged from 151  
427 mN (P80, SD=20) to 269 mN (1MIC, SD=105). Using pupa-substrate interface (green outline in  
428 Fig. 5E) as a measure of contact area between the glue and the substrate, we found a median contact  
429 area of 1.10 mm<sup>2</sup>, which leads to an adhesive strength ranging from 137 to 244 kPa. Few similar  
430 studies have been carried on insect egg adhesive strength. Two of them reported higher values (1-2  
431 MPa for *Opodiphthera* eggs on wood (Li et al., 2008), 4.3-12.2 MPa for whitefly eggs on rose  
432 leaves (Voigt et al., 2019), one study found equivalent values (38.8-271.3 kPa for beetle *C.*  
433 *asparagi* on plant surface (Voigt and Gorb, 2010)) or another lower adhesive strength (13.9-97.8  
434 kPa for the moth *C. pomonella* eggs on fruits (Al Bitar et al., 2014)). To our knowledge, our study is  
435 the first one to report adhesion strength measurements for Diptera pupa.

436 No statistical differences in pull-off forces were found between the different substrates  
437 except for Teflon (median pull-off force is 42 mN, SD= 20), suggesting that the glue can stick to  
438 hydrophobic substrates as well as hydrophilic substrates. We can hypothesize that proteins of the  
439 glue are polarizable, which allows the glue to stick strongly to polarizable substrates that are  
440 differently charged and not to Teflon, which is not polarizable. Indeed, Sgs proteins are highly  
441 charged. They are mostly composed of positively charged amino acids and they are highly  
442 glycosylated with negatively charged sugars (Beckendorf and Kafatos, 1976; Korge, 1977).

443 No differences were found on resin substrates with different roughnesses. We expected that  
444 pull-off force would increase with roughness as contact area on rough substrate is bigger.  
445 Furthermore, we did not find correlation between force and contact area for any of the substrates  
446 used. Both observations can be explained by a possible critical crack initiation stress between the  
447 pupal case and the glue. Indeed, we observed on the glue prints on glass-type substrates that the  
448 glue from the pupa-substrate contact area is partly detached, suggesting that rupture occurs between  
449 the glue and the pupal case. A similar phenomenon may occur on resin substrates, whereas on  
450 Teflon the glue completely goes off from the substrate, suggesting that the rupture occurs between  
451 the glue and the Teflon. Thus, in all the tested substrates except Teflon, the bond between the glue  
452 and the different substrates appears to be stronger than the bond between the glue and the pupal  
453 case. It is thus possible that our adhesion tests measure the adhesive force of the bond between the  
454 glue and the pupal case, which would explain why we observed the same adhesion strength for all  
455 substrates except Teflon. As an alternative explanation for the same adhesiveness measured on all  
456 tested substrates except Teflon, it is possible that the animal modulates the amount of glue it  
457 produces, or the way it spreads the glue over the substrate and its body. It would be interesting to do  
458 adhesion measurement on isolated glue. However, it is challenging to collect the glue as it is

secreted in very small volume and it polymerizes within 3-5 min. after expectoration (Beňová-Liszeková et al., 2019).

Pull-off force values were rather variable between trials for a given substrate (for example from 19 to 451 mN on Menzel non-coated glass). Such a wide range of values could be due to individual variability. Pupae weight could not be deduced accurately by subtracting the final force from the initial force because pupal weight was within the noise of force values. However, individuals from the same population as the pupae used for trials were weighted instead. We found that pupal weight averaged  $1.4 \pm 0.3$  (SE) mg (n=24). The weight variation is negligible compared to the force variation observed within substrates. Surprisingly, considering this average weight and an average force of 217 mN (mean of all trials kept for analysis except trials on Teflon), the glue holds about 15 500 times the weight of a pupa.

## Conclusions

For the first time, we report here measurements of *Drosophila* pupal adhesion strength. We present a pull-off force test to measure pupa adhesion which could be used in the future to explore pupa adhesion in various strains and species of flies. With the powerful genetic tools available in *Drosophila melanogaster*, we now plan to assess the adhesive function of the glue genes. The use of *D. melanogaster* as a model organism for the study of bioadhesives is very promising as it makes it possible and easy to manipulate the composition of the glue.

## Supplementary

**Table S1. raw dataset: Borne\_2020\_glue\_table\_S1.csv**

**Table S2. Contact angle measurements (°) for the different substrates.** Contact angles were measured for each substrate. All the measurements were done before the pull-off force measurements except for PLL-PEG-coated glass.

| substrate                               | mean   | std error |
|-----------------------------------------|--------|-----------|
| <b>1MIC-resin</b>                       | 112.68 | 0.47      |
| <b>P1000-resin</b>                      | 109.19 | 0.89      |
| <b>P80-resin</b>                        | 103.27 | 1.29      |
| <b>teflon</b>                           | 96.64  | 1.88      |
| <b>smooth_resin</b>                     | 84.11  | 1.93      |
| <b>9MIC-resin</b>                       | 78.63  | 1.89      |
| <b>PLL-coated glass</b>                 | 55.15  | 1.28      |
| <b>PLL-PEG-coated glass</b>             | 38.65  | 1.06      |
| <b>oxygen-activated glass</b>           | 37.03  | 1.39      |
| <b>non-coated glass (Menzel)</b>        | 28.86  | 0.91      |
| <b>non-coated glass (Roth) unwashed</b> | 20.05  | 0.57      |
| <b>non-coated glass (Roth) washed</b>   | 11.84  | 1.40      |

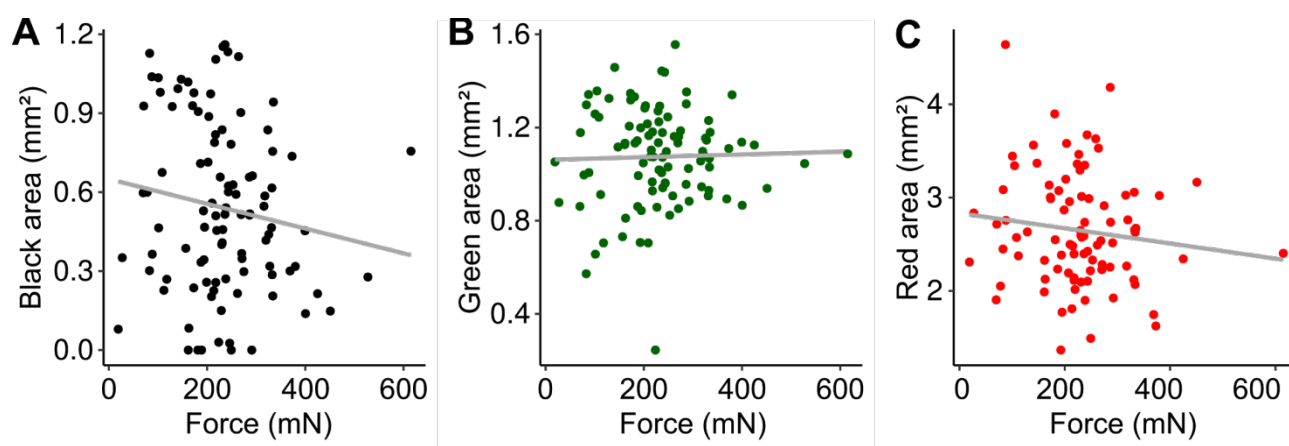

**Figure S1. Force in function of (A) black area, (B) green area and (C) red area.** Each dot represents one print on glass-type substrates. The grey lines represent the linear regressions: **(A)**  $r^2=0.01168$ ,  $y=257.69 - 46.03x$ ,  $p=0.144$  ; **(B)**  $r^2=-0.009391$ ,  $y=218.05 + 13.73x$ ,  $p=0.7793$  ; **(C)**  $r^2=0.004791$ ,  $y=279.36 - 19.97x$ ,  $p=0.2369$ ; where  $r^2$  is the adjusted  $r^2$ .

## Acknowledgements

We acknowledge T. Roeder and C. Sandberg (Kiel University, Germany) for help with fly culture, S. De Beco (Université de Paris, Paris) for help with PLL-PEG coating and L. Corté (Mines-ParisTech, ESPCI, Paris) for discussions.

## Funding

The research leading to this paper has received funding from the European Research Council under the European Community's Seventh Framework Program (FP7/2007–2013 Grant Agreement no. 337579) to VCO. FB was supported by a PhD fellowship from ENS Paris Saclay and by a travel grant from COST ENBA CA-15216. SG was supported by the German Science Foundation (project GO 995/38-1).

## 538 **References**

- 539 Al Bitar, L., Gorb, S.N., Zebitz, C.P.W., and Voigt, D., 2012. Egg adhesion of the codling  
540 moth *Cydia pomonella* L. (Lepidoptera, Tortricidae) to various substrates: I. Leaf surfaces of  
541 different apple cultivars. *Arthropod-Plant Interact.* 603: 471-488.
- 542 Al Bitar, L., Gorb, S.N., Zebitz, C.P.W., Voigt, D., 2014. Egg adhesion of the codling moth *Cydia*  
543 *pomonella* L. (Lepidoptera, Tortricidae) to various substrates: II. Fruit surfaces of different  
544 apple cultivars. *Arthropod-Plant Interact.* 8, 57–77.
- 545 Beckendorf, S.K., Kafatos, F.C., 1976. Differentiation in the salivary glands of *Drosophila*  
546 *melanogaster*: Characterization of the glue proteins and their developmental appearance.  
547 *Cell.* 9, 365–373.
- 548 Beltramí, M., Medina-Muñoz, M.C., Arce, D., Godoy-Herrera, R., 2010. *Drosophila* pupation  
549 behavior in the wild. *Evol. Ecol.* 24, 347–358.
- 550 Beňová-Liszeková, D., Beňo, M., Farkaš, R., 2019. Fine infrastructure of released and solidified  
551 *Drosophila* larval salivary secretory glue using SEM. *Bioinspir. Biomim.* 14, 055002.
- 552 Betz, O., 2010. Adhesive exocrine glands in insects: Morphology, ultrastructure, and adhesive  
553 secretion, in: von Byern, J., Grunwald, I. (Eds.), *Biological Adhesive Systems: From Nature*  
554 *to Technical and Medical Application*. Springer, Vienna, pp. 111–152.
- 555 Da Lage, J.-L., Thomas, G.W.C., Bonneau, M., Courtier-Orgogozo, V., 2019. Evolution of salivary  
556 glue genes in *Drosophila* species. *BMC Evol. Biol.* 19, 36.
- 557 Farkaš, R., 2016. The complex secretions of the salivary glands of *Drosophila melanogaster*, A  
558 model System, in: Cohen, E., Moussian, B. (Eds.), *Extracellular composite matrices in*  
559 *Arthropods*. Springer International Publishing, Cham, pp. 557–600.
- 560 Fraenkel, G., Brookes, V.J., 1953. The process by which the puparia of many species of flies  
561 become fixed to a substrate. *Biol. Bull.* 105, 442–449.
- 562 Gorb, S. N. (2001) *Attachment Devices of Insect Cuticle*. Dordrecht, Boston, London: Kluwer  
563 Academic Publishers. p 305.
- 564 Graham, L., 2008. Biological Adhesives from Nature, in: Wnek, G., Bowlin, G. (Eds.),  
565 *Encyclopedia of Biomaterials and Biomedical Engineering, Second Edition - Four Volume*  
566 *Set*. CRC Press, pp. 236–253.
- 567 Grossfield, J., 1978. Non-sexual behavior of *Drosophila*, in: *The Genetics and Biology of*  
568 *Drosophila*. pp. 1–126.
- 569 Held, L.I., 1992. Pupal development outside the pupal case. *DIS* 71, 204.
- 570 Korge, G., 1977. Larval saliva in *Drosophila melanogaster*: Production, composition, and

relationship to chromosome puffs. Dev. Biol. 58, 339–355.

Korge, G., 1975. Chromosome puff activity and protein synthesis in larval salivary glands of *Drosophila melanogaster*. Proc. Natl. Acad. Sci. USA 72, 4550–4554.

Kress, H., 1982. Biochemical and ontogenetic aspects of glycoprotein synthesis in *Drosophila virilis* salivary glands. Dev. Biol. 93, 231–239.

Lee, B.P., Messersmith, P.B., Israelachvili, J.N., Waite, J.H., 2011. Mussel-inspired adhesives and coatings. Annu. Rev. Mater. Res. 41, 99–132.

Li, D., Huson, M.G., Graham, L.D., 2008. Proteinaceous adhesive secretions from insects, and in particular the egg attachment glue of *Opodiphthera* sp. moths. Arch. Insect Biochem. Physiol. 69, 85–105.

Pino, F.D., Jara, C., Pino, L., Godoy-Herrera, R., 2014. The neuro-ecology of *Drosophila* pupation behavior. PLOS ONE. 9, e102159.

Ramesh, S.R., Kalisch, W.-E., 1988. Glue proteins in *Drosophila nasuta*. Biochem. Genet. 26, 527–541.

Salerno, G., Rebora, M., Gorb, E., Gorb, S., 2018. Attachment ability of the polyphagous bug *Nezara viridula* (Heteroptera: Pentatomidae) to different host plant surfaces. Sci Rep 8, 10975.

Shirk, P.D., Roberts, P.A., Harn, C.H., 1988. Synthesis and secretion of salivary gland proteins in *Drosophila gibberosa* during larval and prepupal development. Roux Arch. Dev. Biol. 197, 66–74.

Sokolowski, M.B., 1985. Genetics and ecology of *Drosophila melanogaster* larval foraging and pupation behaviour. J. Insect Physiol. 31, 857–864.

Spurr, A.R., 1969. A low-viscosity epoxy resin embedding medium for electron microscopy. J. Ultrastruct. Res. 26, 31–43.

Team, R.C., 2013. R: A language and environment for statistical computing.

Tyler, M.S., 1994. Development of the fruit fly, in: *Developmental Biology: A Guide for Experimental Study*. Sinauer Associates Massachusetts, pp. 85–106.

Vandal, N.B., Siddalingamurthy, G.S., Shivanna, N., 2008. Larval pupation site preference on fruit in different species of *Drosophila*. Entomol. Res. 38, 188–194.

Voigt, D., Gorb, S., 2010. Egg attachment of the asparagus beetle *Crioceris asparagi* to the crystalline waxy surface of *Asparagus officinalis*. Proc. R. Soc. B Biol. Sci. 277, 895–903.

Voigt, D., Schrameyer, K., Kiefer, J., Zebitz, C.P.W., Gorb, S., 2019. Anchoring of greenhouse whitefly eggs on different rose cultivars. Arthropod-Plant Interact. 13, 335–348.



604 Vouldibio, J., Cappy, P., Defaye, D., Pla, E., Sandrin, J., Csink, A., David, J.R., 1989. Short-range  
 605 genetic structure of *Drosophila melanogaster* populations in an Afrotropical urban area and  
 606 its significance. Proc. Natl. Acad. Sci. USA 86, 8442–8446.  
 607
