1 **“The glue produced by *Drosophila melanogaster* for pupa adhesion is universal”**

2

3 Flora Borne<sup>1</sup>, Alexander Kovalev<sup>2</sup>, Stanislav Gorb<sup>2</sup>, Virginie Courtier-Orgogozo<sup>1</sup>

4

5 <sup>1</sup>Institut Jacques Monod, CNRS, Univ. de Paris, 75013 Paris, France.

6 <sup>2</sup>Department of Functional Morphology and Biomechanics, Zoological Institute of the University of Kiel,

7 Kiel, Germany

8

9 corresponding authors: Alexander Kovalev: [akovalev@zoologie.uni-kiel.de](mailto:akovalev@zoologie.uni-kiel.de), Stanislav Gorb:

10 [sgorb@zoologie.uni-kiel.de](mailto:sgorb@zoologie.uni-kiel.de), Virginie Courtier-Orgogozo: [virginie.courtier@normalesup.org](mailto:virginie.courtier@normalesup.org).

11

12 **ABSTRACT**

13 Insects produce a variety of adhesives for diverse functions such as locomotion, mating, egg or  
14 pupal anchorage to substrates. Although they are important for the biology of organisms and  
15 potentially represent a great resource for developing new materials, insect adhesives have been little  
16 studied so far. Here, we examined the adhesive properties of the larval glue of *D. melanogaster*.  
17 This glue is made of glycosylated proteins and allows the animal to adhere to a substrate during  
18 metamorphosis. We designed an adhesion test to measure the pull-off force required to detach a  
19 pupa from a substrate and to evaluate the contact area covered by the glue. We found that the pupa  
20 adheres with similar forces to a variety of substrates (with distinct roughness, hydrophilic and  
21 charge properties). We obtained an average pull-off force of 217 mN, corresponding to 15 500 times  
22 the weight of a pupa and adhesion strength of 137-244 kPa. Surprisingly, the pull-off forces did not  
23 depend on the contact area. Our study paves the way for a genetic dissection of the components of  
24 *Drosophila melanogaster* glue that confer its particular adhesive properties.

25

26 (184 words, max 250 words)

27

28 **Abbreviations.** PLL: Poly-L-Lysine, PLL-PEG: Poly-L-Lysine-Polyethyl glycol, SEM: Scanning  
29 Electron Microscopy

30

31 **Keywords.** Bioadhesion, *Drosophila*, insect, attachment, adhesion assay

32

## 33 INTRODUCTION

34 Natural adhesives have a very important significance for the biology of organisms and are a great  
35 material for innovation of biologically-inspired technical adhesives. The most studied bioadhesives  
36 are from marine organisms, mussels and barnacles (Power et al., 2010), and they are now used in a  
37 variety of biomimetic applications such as surgical sealants to repair tissues or synthetic polymer  
38 coatings (Lee et al., 2011). Bioadhesives in insects are less studied although they are extremely  
39 diverse (Gorb, 2001; Graham, 2008; Li et al., 2008; Betz, 2010). Some insects produce glue to  
40 secure their eggs or cocoon (Betz, 2010). A few studies have been carried out on egg glue  
41 composition and particularly on the glue adhesive strength in different insect species. For example,  
42 in *Opodiphthera* moths, females secrete a viscous fluid from their accessory reproductive gland that  
43 sticks their eggs to each other and to the substratum. This hydrogel-type glue is highly elastic and  
44 mainly made of proteins. The shear strength reaches 1-2 MPa on wood, which could potentially be  
45 enough for some industrial applications (Li et al., 2008). Furthermore, these eggs and eggs from  
46 other species such as *Crioceris asparagi* have the ability to attach to plants covered with crystalline  
47 epicuticular waxes known to be non-adhesive (Voigt and Gorb, 2010). Similar properties have been  
48 revealed in the egg glue of codling moth (Al Bitar et al., 2012; 2014). Thus, investigating the glue  
49 of various insect species appears to be a great strategy to find novel universal and substrate-specific  
50 adhesives. Surprisingly, although *Drosophila melanogaster* is a model organism that is extensively  
51 used in laboratories, little is known about pupal adhesion in this species.

52 *Drosophila melanogaster* larvae secrete a glue from their salivary glands right before  
53 pupariation (Fraenkel and Brookes, 1953). After expectoration, following larval peristaltic  
54 movements, the secreted liquid spreads between the body and the substrate and dries within a few  
55 minutes (Beňová-Liszeková et al., 2019). This glue allows the animal to stay firmly attached to an  
56 external surface for several days, until the adult fly emerges from the pupal case, while the pupal  
57 case remains attached to the substrate. The pupa of other Brachycera fly species is also often  
58 attached to a substrate during metamorphosis (Fraenkel and Brookes, 1953).

59 In the wild, *Drosophila* pupae have been reported to adhere to a great variety of substrates  
60 from fruits to beer bottles (Vouidibio et al., 1989) and in diverse environments. Particularly, pupae  
61 have been observed on dry parts of various fruits, some species have also been found fixed to wood,  
62 wet rotten parts of fruits, deep in the soil and to one another (Grossfield, 1978; Sokolowski, 1985;  
63 Vandal et al., 2008; Beltramí et al., 2010; Castillo et al., 2014). Pupal attachment might be  
64 important for not being taken away by predators, to resist environmental conditions (wind or rain)  
65 or to help adult flies emerge from the pupal case after metamorphosis (Da Lage et al., 2019).

66 In *D. melanogaster* (Korge, 1975; 1977) and other *Drosophila* species (*D. virilis* (Kress,  
67 1982), *D. natusa* (Ramesh and Kalisch, 1988), *D. gibberosa* (Shirk et al., 1988)), the glue is  
68 composed of a small number of proteins called salivary gland secreted (Sgs) proteins. These  
69 proteins present repeated motifs and glycosylations, which are commonly found in adhesive  
70 proteins (Graham, 2008; Betz, 2010). Some of the *Drosophila* glue proteins are rich in cysteine, like  
71 many marine adhesive proteins and this property could be important to maintain a secondary  
72 structure by forming disulfide bonds (Graham, 2008). Other *Drosophila* glue proteins are rich in  
73 serine and threonine and highly O-glycosylated, suggesting that they may interact with water to  
74 hydrate or dehydrate the glue (Farkaš, 2016). The *Sgs* genes have evolved rapidly between species  
75 and within species (Korge, 1975; 1977; Beckendorf and Kafatos, 1976; Da Lage et al., 2019).

76 Here, we investigated the adhesive properties of the glue of *D. melanogaster* on different  
77 substrates. First, we analyzed the contact region between the pupa and the surface to which it is  
78 attached. Then, we designed a pull-off force measurement set up. We assessed the force required to  
79 detach the pupa from different substrates, with different hydrophilic and charge properties or with  
80 different roughnesses, and analyzed the way rupture occurs.

81

82

## 83 **METHODS**

### 84 **Flies**

85 *D. melanogaster* Canton S flies (gift from Roger Karess) were cultured in plastic vials on standard  
86 medium (1L: 62.5 g yeast, 62.5 g cornmeal, 10.0 g agar-agar, 20.0 g glucose monohydrate, 30.0 g  
87 molasse, 30.0 g sugar beet syrup, 10.0 ml propionic acid (10%), nipagin (10%)) at room  
88 temperature.

89

### 90 **Larva preparation**

91 Third instar wandering larvae were washed in PBS to remove traces of food and microorganisms  
92 from their surface, put in empty Petri dishes with a paintbrush and kept in high humidity  
93 atmosphere at room temperature in a closed plastic box (15x10x5 cm) containing wet cotton. When  
94 larvae stopped moving, they were transferred on the substrate of interest with soft forceps, kept at  
95 high humidity as mentioned above and let to pupariate. Five to 24 h after transfer to the substrate of  
96 interest, the substrate with pupae attached to it was put for 1 h at room humidity to allow the glue to  
97 dry completely and then the pupae were used for adhesion assays. Pupae not used for assays were

98 weighed individually using Mettler Toledo AG203 (DeltaRange<sup>®</sup>, Gießen, Germany). Temperature,  
99 humidity and atmospheric pressure were monitored daily.

100

#### 101 **Preparation of glass and Teflon substrates**

102 Two types of non-coated microscopic glass slides were used to measure adhesion on glass: Menzel  
103 Superfrost microscope glass slide from ThermoScientific™ (#AGAB000080) and microscopic  
104 glass slide from Roth (#0656.1). Atmospheric plasma-treated glass slides were prepared using a  
105 PlasmaBeam (Diener electronic GmbH, Ebhausen, Germany) on Roth glass slides for 1 min. To  
106 prepare Poly-L-Lysine-Polyethyl glycol-coated (PLL-PEG-coated) glass slides, Roth glass slides  
107 were cleaned with a plasma cleaner then coated with 0.1 mg·ml<sup>-1</sup> non-biofunctionalized PEG side-  
108 chains (methoxy-terminated) (SuSos). Poly-L-Lysine-coated (PLL-coated) glass slides from  
109 Thermo Scientific™ (J2800AMNZ) and pieces of Teflon (Polytetrafluorethylen, Kelux, Geldern,  
110 Germany) were also tested.

111

#### 112 **Preparation of Spurr epoxy resin substrates**

113 First, a silicone cast was made by pouring polyvinylsiloxane (light body Affinis, Coltène/Whaledent  
114 GmbH + Co. KG, Langenau, Germany) over a cleaned Roth glass slide (to create the smooth resin,  
115 Ra=80 nm (Salerno et al., 2014)) or over glass slides covered by polished papers with different  
116 grain sizes: 1 µm and 9 µm (Ra=0.54 and 2.47 µm measured over 1400x1050 µm area using  
117 NewView 6k (Zygo, Middlefield, CT, USA) white light interferometer; both with FiberMet  
118 Abrasive disks, Buehler) (Salerno et al., 2014), P1000 and P80 (Ra=3.94 and 40.40 µm measured  
119 over the same area using VR 3100 (Keyence, Neu-Isenburg, Germany) 3D profilometer; polishing  
120 papers, Bahauss). After a couple of minutes, the slide and the polished paper were removed and the  
121 edges of the polyvinylsiloxane cast were made higher. Then, Spurr epoxy resin (Spurr, 1969) was  
122 poured into the polyvinylsiloxane cast and polymerized at 65 °C overnight in Memmert U 15 oven  
123 (Schwabach, Germany). Resin was then allowed to cool down for a couple of hours before  
124 unmolding. Each resin was used for several assays.

125

#### 126 **Contact angle measurements**

127 Water contact angles on different substrate surfaces were measured using a contact angle  
128 measurement device OCA20 (DataPhysics Instruments, Filderstadt, Germany). A 2-µl water droplet  
129 was deposited on a substrate, then an image of the droplet was taken after five seconds, and contact  
130 angles were determined from the fit of the droplets shape with a sphere using SCA 202 software

131 (DataPhysics Instruments, Filderstadt, Germany). All the contact angle measurements were done  
132 before the pull-off force assays except for PLL-PEG-coated glass.  
133

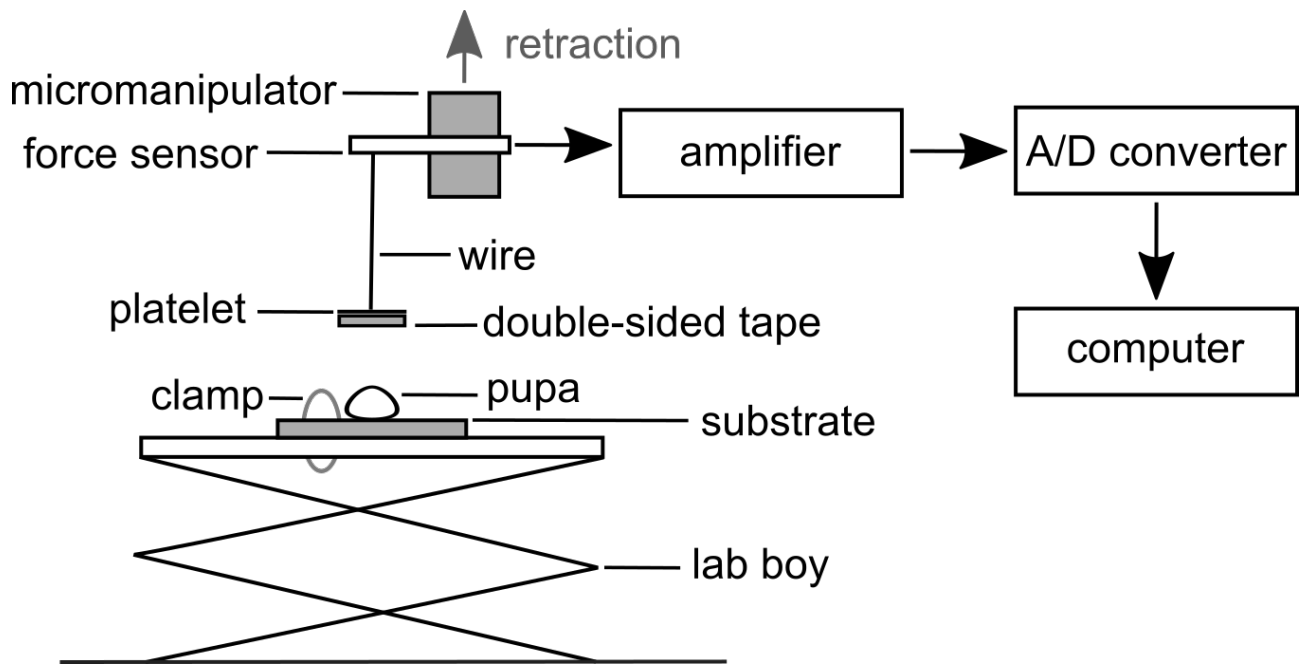

134  
135 **Figure 1. Experimental set-up for measuring adhesion force of individual *Drosophila***  
136 ***melanogaster* pupae.** The substrate on which the pupa was naturally sticking was fixed on a lab  
137 boy using a clamp and brought into contact with a piece of double-sided sticky tape attached to a  
138 metal platelet. To detach the pupa from the substrate, a force sensor linked to the platelet by a metal  
139 wire was moved up using a motorized micromanipulator. The time-force sensor signal was  
140 amplified and converted before being processed in a computer.

141

#### 142 **Adhesion force measurement**

143 To measure pupal adhesion, a force transducer (100 g capacity, FORT100, World Precision  
144 Instruments, Sarasota, FL, USA) mounted on a motorized 3D micromanipulator (DC3001R, World  
145 Precision Instruments, Sarasota, FL, USA) was used (Fig. 1). The substrate was horizontally  
146 clamped to a lab boy. A piece of aluminum platelet of 1.0 x 2.0 x 0.2 mm attached to the force  
147 transducer by a metal wire (0.1 mm) was covered by a piece of double-sided adhesive tape (tesa,  
148 extra strong, #05681-00018). A new piece of tape was glued for each measurement. Only pupae  
149 attached on their ventral side and which did not contact other pupae were used for measurements.  
150 The tape on aluminum platelet was brought into contact with the dorsal part of the pupa by  
151 adjusting manually the height of the lab boy. The force transducer was then moved upwards with a  
152 velocity of 200  $\mu\text{m/s}$  until detachment of the pupa. The signal from the force transducer was

153 amplified using Transbridge TBM4M and digitized using Lab-Trax-4 data acquisition hardware  
154 (WPI, Sarasota, FL, USA). Three phases could be distinguished on force curves recorded using  
155 LabScribe v3 (iWorks, Dover, NH, USA) (Fig. 2A). During the initial phase, the pupa was not  
156 attached to the tape and force with no pupa weight was measured. The pulling phase started when  
157 the pupa came into contact with the tape. During this phase, the pupa was stretched until it detaches  
158 from the substrate (maximal force). Finally, during the resting phase, the force went down to a basal  
159 value including pupal weight. The set up was calibrated before the first assay with a standard  
160 weight. Pull-off force corresponding to the force at pupa detachment was calculated as the  
161 difference between the maximal pulling force and the mean force at the initial phase (offset). The  
162 force corresponding to the adjustment of the lab boy until pupa glued to the tape between the initial  
163 phase and the pulling phase was not recorded.

164         328 pupae were measured using our pull-off force measurement set up. In 59 (17%) cases,  
165 the pupal case cracked on the dorsal side between the head and the thorax during the pulling  
166 process. For 36 (11%) of them, the pupal case covering the ventral part of the head detached from  
167 the rest of the pupal case and remained glued to the substrate at the end of the trial, while the  
168 complete pupa body was detached together with the posterior part of the pupal case. For the 23  
169 (7%) other cases, the whole animal together with the broken pupal case were detached from the  
170 substrate. These 59 (18%) cases were excluded from further analysis. Furthermore, two or more  
171 trials were sometimes necessary to detach a pupa, when the connection between the double-sided  
172 tape and the pupa failed. If the maximal force on the last trial was higher than the previous ones  
173 (Fig. 2E), the last trial was used for analysis unless the pupal case was damaged. If the maximal  
174 force was higher in one of the first trials, the measurement was excluded, suggesting that the pupa  
175 has been partly detached during the first trials (n=23 (7%), Fig. 2F). 11 other cases (3%) were  
176 excluded from the analysis: imperfections in the substrates (n=3), pupa not attached ventrally (n=6),  
177 pupa not attached, with no glue (n=1) and tape glued to the substrate (n=1). In total, 93 cases (28%)  
178 were excluded.

179         We then organized the remaining 235 cases (100%) into four groups. The first group gathers  
180 the trials for which the whole pupa detached at once and the tape stayed well fixed to the pupa  
181 (n=56 (24%), Fig. 2A). The second group gathers the trials for which the piece of tape started to  
182 peel from the pupal case surface during the pulling process and pupa detached at once. For this  
183 group, the force-time curve had a negative derivative at some point during the pulling phase (n=  
184 106 (45%), Fig. 2B). The third group gathers the trials for which the whole pupa did not detach at  
185 once but the head part stayed attached longer than the rest of the body. In such cases, two peaks

186 were observed on the force-time curve (n=29 (12%), Fig. 2C): the first one corresponds to the main  
187 body part detachment and the second one to the head part detachment. The first peak always  
188 displayed the maximal force. Finally, the fourth group gathers the trials for which tape started to  
189 peel before pupa detachment and for which the whole pupae did not detach at once. For this group,  
190 the force-time curve had a negative derivative at some point during the pulling phase and a second  
191 peak was observed after the peak corresponding to the maximal force (n=44 (19%), Fig. 2D).

192 We tested if these four groups having different detachment behavior have an effect on the  
193 resulting adhesion force. We performed a two-way ANOVA considering force as the dependent  
194 variable. We found that substrates but not groups had a significant impact on pupa adhesion force  
195 and that there was no significant interaction between groups and substrates (substrate:  $F=12.86$ ,  
196  $P<2e-16$ , group and interaction group-substrate:  $P<0.05$ ).

197

198

199

200

201

202

203

204

205

206

207

208

209

210

211

212

213

214

215

216

217

218

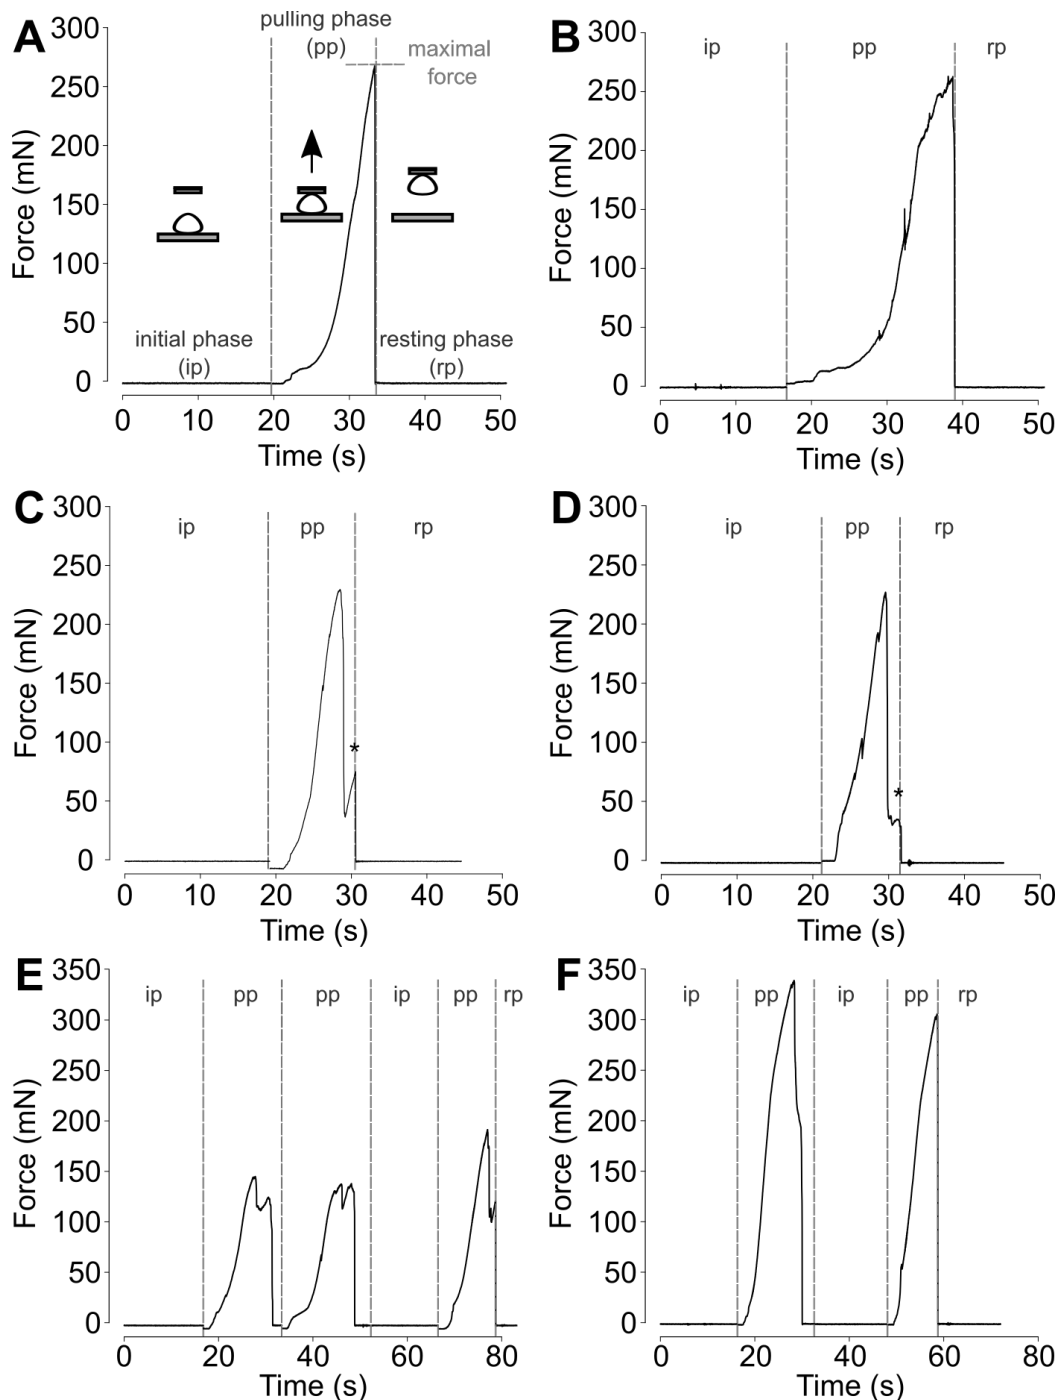

219

220 **Figure 2. Representative force-time curves obtained in pull-off force measurements.** (A) Force-  
221 time curve consists of three phases: the initial phase (ip) corresponding to the force before pupa is  
222 attached to the tape, the pulling phase (pp) from the time the pupa is attached to the tape to the  
223 maximal force, and the resting phase (rp) after detachment. The maximal force corresponds to the  
224 force at pupa detachment. Force-time curve corresponding to the attachment of the pupa to the tape  
225 (between initial phase and pulling phase) is not shown. Every phase is separated with a vertical dot  
226 line. Representative curves of the following cases are shown: (A) the tape does not peel from the



227 pupa during the pulling phase and the pupa is detached at once, **(B)** the tape peels from the pupa  
228 during the pulling phase and at the end the pupa is detached at once, **(C)** first the posterior part and  
229 then the head of the pupa are detaching. Head detachment produces a small peak on the curve  
230 (marked with a star), **(D)** the tape peels from the pupa, then the posterior part of the pupa first  
231 detaches and then the head of the pupa detaches (marked with a star), **(E)** the tape detaches from the  
232 pupa twice and then the pupa detaches from the substrate at the third trial, maximal force is  
233 observed during pupa detachment **(F)** tape detaches from pupa once and pupa detaches from the  
234 substrate at the second trial, maximal force is observed during tape detachment from the pupa.

235

### 236 **Microscopy**

237 After pupal detachment, images of glue prints remaining on glass substrates (100 cases) were taken  
238 with a Keyence VR 3100 microscope at x40 or x80. Prints areas were measured manually using  
239 imageJ (1.50d, java 1.8.0\_212, 64-bit). For 1 case, prints were altered before the picture and areas  
240 could not be measured. For 11 cases, the red area could not be visualized and was not measured.

241 One pupa detached from Menzel non-coated glass slide was mounted on aluminum stubs by  
242 using double-sided carbon conductive tape (Plano, Wetzlar, Germany). The sample was frozen in  
243 liquid nitrogen, sputter-coated with gold-palladium (8 nm thickness) at -140°C, and examined in a  
244 cryo-SEM (Hitachi S-4800; Hitachi Ltd., Tokyo, Japan) at -120°C and an accelerating voltage of 3  
245 kV.

246

### 247 **Statistical analysis**

248 Statistical differences in pull-off forces between substrates, groups and interactions were tested by  
249 two-way ANOVA using R *aov* function (R version 3.4.4, Team, 2013). Statistical differences in  
250 pull-force between substrates were tested by one-way ANOVA with the same R *aov* function  
251 followed by multiple pairwise comparison tests using Tukey test with R *TukeyHSD* function.  
252 Pearson correlation between pull-off force and contact areas were tested using R *lm* function. Effect  
253 of humidity, temperature, pressure and age were also tested using R *lm* function.

254

255

256

257

258

259

260 **RESULTS**

261 **Morphology of the glue**

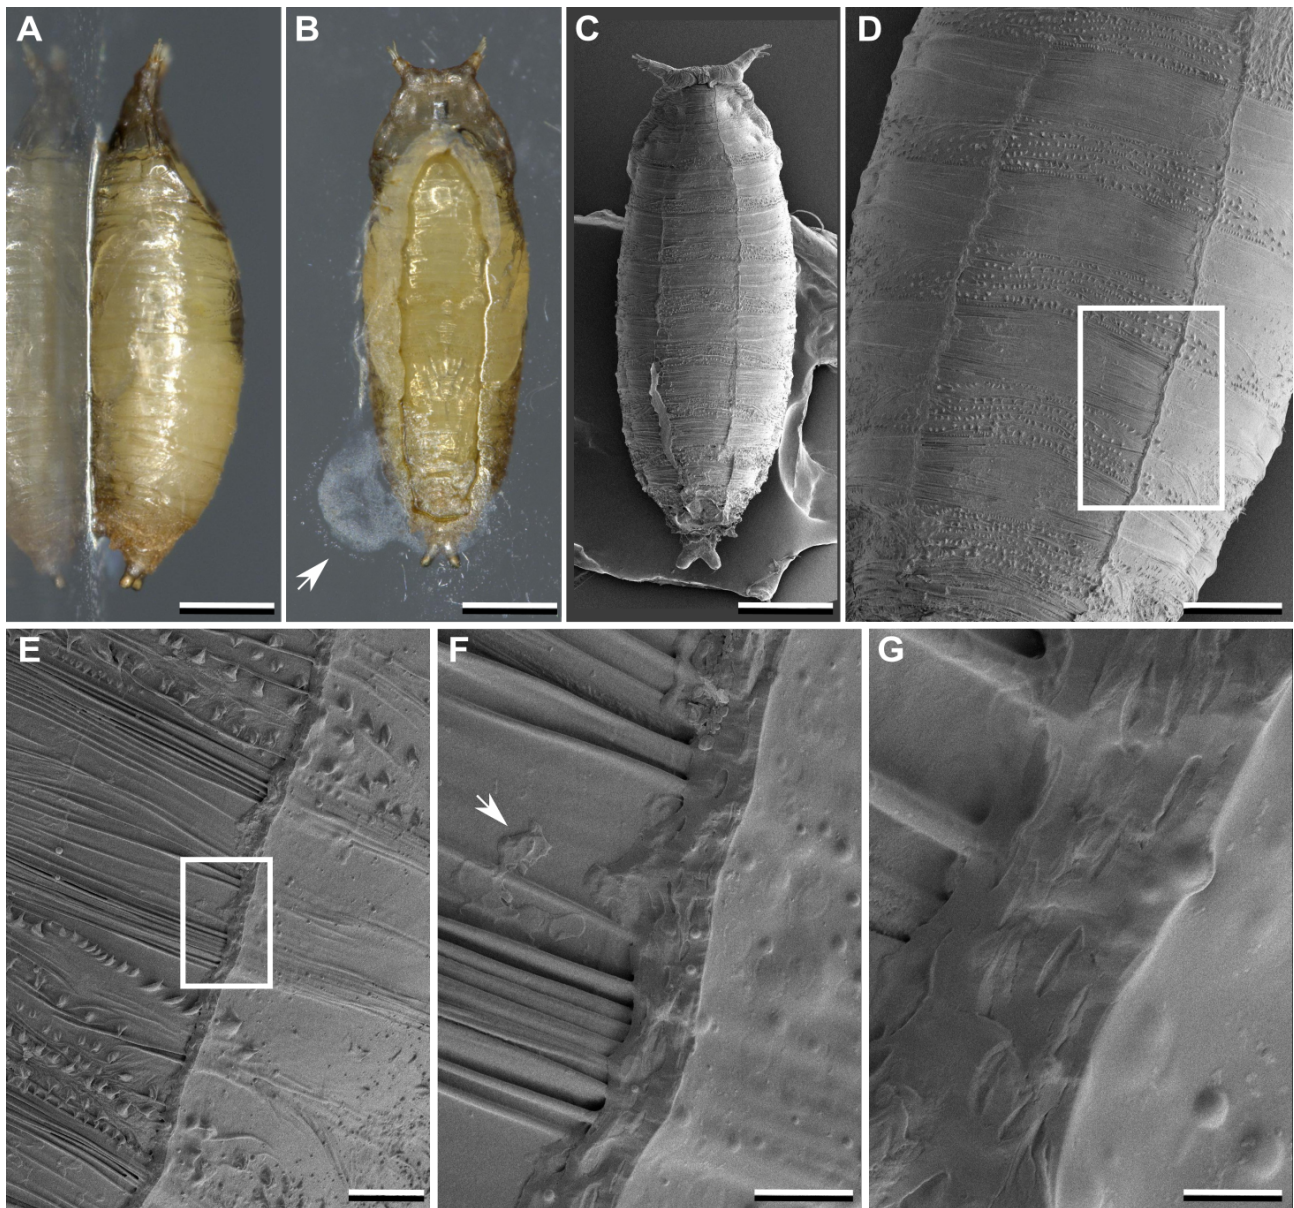

262  
263 **Figure 3. Morphology of *Drosophila melanogaster* glue.** (A,B) Pupa naturally attached to a glass  
264 slide viewed from the side (A) and ventrally (B). Glue at the posterior part of the animal sometimes  
265 forms a plug on the substrate (B, arrow). (C-G) Cryo-SEM micrographs of a pupa after detachment  
266 from a glass slide. The white squares in (D) and (E) indicate respectively the location of the images  
267 (E) and (F). After detachment, glue is not present on the former contact area on the ventral side  
268 except thin traces (F, arrow) and remains on the sides of the ventral part. Scale bars: (A-C) 500  $\mu\text{m}$ ,  
269 (D) 250  $\mu\text{m}$ , (E) 50  $\mu\text{m}$ , (F) 20  $\mu\text{m}$ . (G) 5  $\mu\text{m}$ .

270 Pupae of *D. melanogaster* attach naturally to substrates on their ventral side via a layer of glue  
271 which forms an oval-shaped patch visible on glass slides of approximately 2 mm length and 0.5 mm  
272 width (Fig. 3A-B). Glue near the posterior part of the animal usually forms a bigger plug that can  
273 spread on the substrate (arrow, Fig. 3B). SEM observations of pupae detached from non-coated  
274 glass slides show that sometimes only thin traces of glue remain on the former contact area (Fig.  
275 3C-G arrow in Fig. 3F). The glue layer covering the pupal case appears to be organized in thin  
276 layers (Fig. 3F-G). Air bubbles are observed between the layers and the glue does not fill all the  
277 asperities of the cuticle surface (Fig. 3I-J).

278

### 279 **Pupal adhesion on different substrates**

280 We performed pull-off force measurements using pupae naturally attached to 11 different substrates:  
281 non-coated glass (from Roth and from Menzel), PLL-coated glass, PLL-PEG-coated glass, oxygen-  
282 activated glass, Teflon, and Spurr epoxy resin with 5 different roughnesses. We measured the  
283 contact angle of these 11 substrates (Table S2). Contact angle values ranged from 11° (highly  
284 hydrophilic substrate) to 112° (highly hydrophobic substrate). In total, 328 pupae were measured.  
285 We excluded 93 cases for which adhesion measures were not reliable, for instance when the pupal  
286 case was damaged during the assay or when several trials with the same pupa disrupted its adhesion  
287 (see Methods).

288

289

290

291

292

293

294

295

296

297

298

299

300

301

302

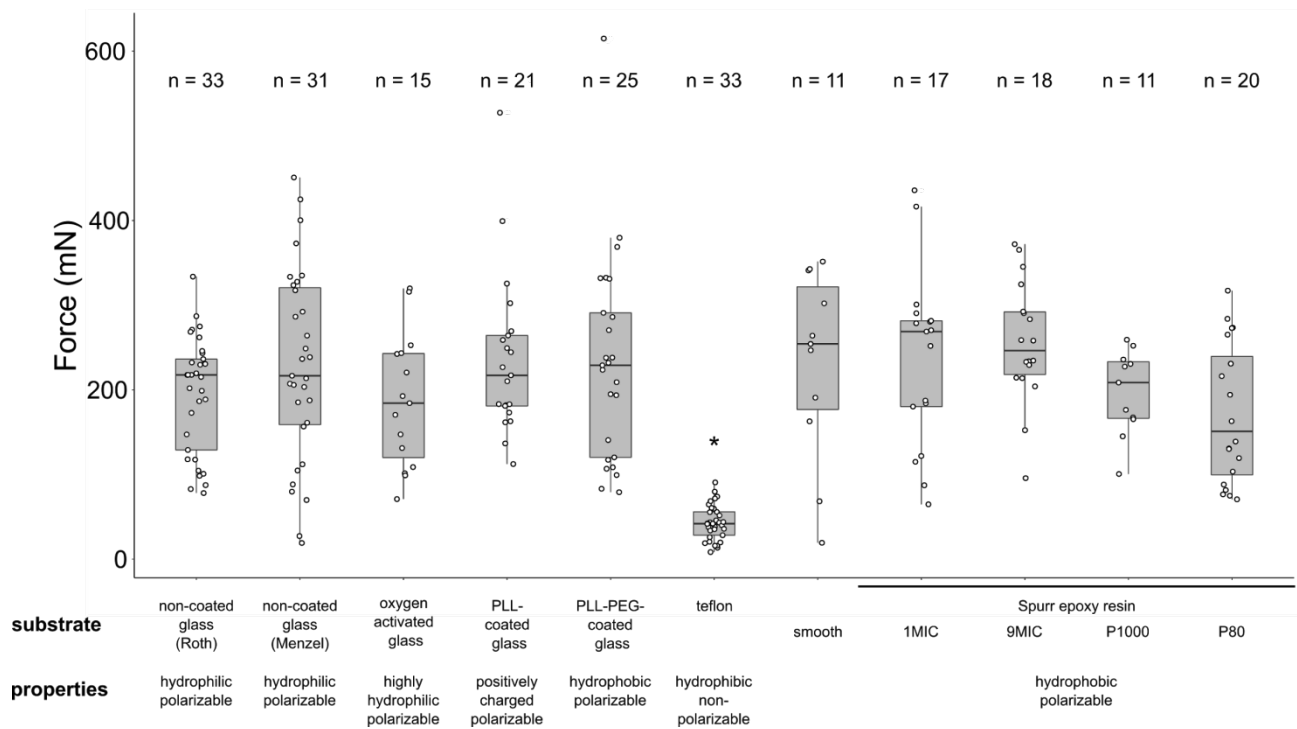

303

304 **Figure 4. Force required to pull-off pupae from different substrates.** Each dot corresponds to a  
 305 single pupa and n indicates the total number of pupae tested for each surface. Ends of the boxes  
 306 define the first and third quartiles. The black horizontal line represents the median. The vertical line  
 307 on the top of the box extends to the largest value no further than  $1.5 * IQR$  from the upper hinge of  
 308 the box. The vertical line on the bottom of the box extends to the smallest value at most  $1.5 * IQR$   
 309 of the hinge. (IQR: inter-quartile range is the distance between the first and the third quartiles). Data  
 310 beyond the end of these lines are "outlying" points. Asterisks indicate significant difference  
 311 ( $P < 0.001$ ) between Teflon and all the other substrates.

312

313 Medians of the pull-off forces on glass-substrates (non-coated, PLL-coated, PLL-PEG-  
 314 coated and oxygen-activated glass) ranged from 184 mN (oxygen-activated glass,  $SD = 78$ ) to 229  
 315 mN (PLL-PEG-coated glass,  $SD = 122$ ) while for Teflon, force was 42 mN ( $SD = 20$ ) (Fig. 4). Only  
 316 pull-off force on Teflon was significantly different from forces obtained on other substrates (one-  
 317 way ANOVA  $F = 12.92$ ,  $P < 2e-16$ , followed by all pairwise comparison Tukey-Test,  $P < 0.001$  for all  
 318 comparisons with Teflon). Similarly, pull-off force medians on resin with different roughnesses  
 319 ranged from 151 mN (P80,  $SD = 82$ ) to 269 mN (1MIC,  $SD = 105$ ) and no statistical differences  
 320 were found (from same ANOVA and Tukey tests). During our assays, the ranges for humidity,  
 321 temperature, pressure and age of pupa were the following: 34.4 - 58.8 %, 23.5 - 27.9 °C, 1005 -  
 322 1026 mb, 3.5 - 23 h after deposition of the wandering L3 larva on the substrate. No effect of

323 humidity, temperature, pressure and age of pupa was found (multiple linear regression with force as  
324 dependent variable and substrate, humidity, pressure, age as independent variables).

325 In conclusion, we found that the pull-off force is independent of substrate surface chemistry  
326 (except Teflon) and of roughness in wide range (80 nm – 40.40  $\mu\text{m}$ ).

327

328

329

330

331

332

333

334

335

336

337

338

339

340

341

342

343

344

345

346

347

348

349

350

351

352

353

354

355

356 **The glue-substrate interface**

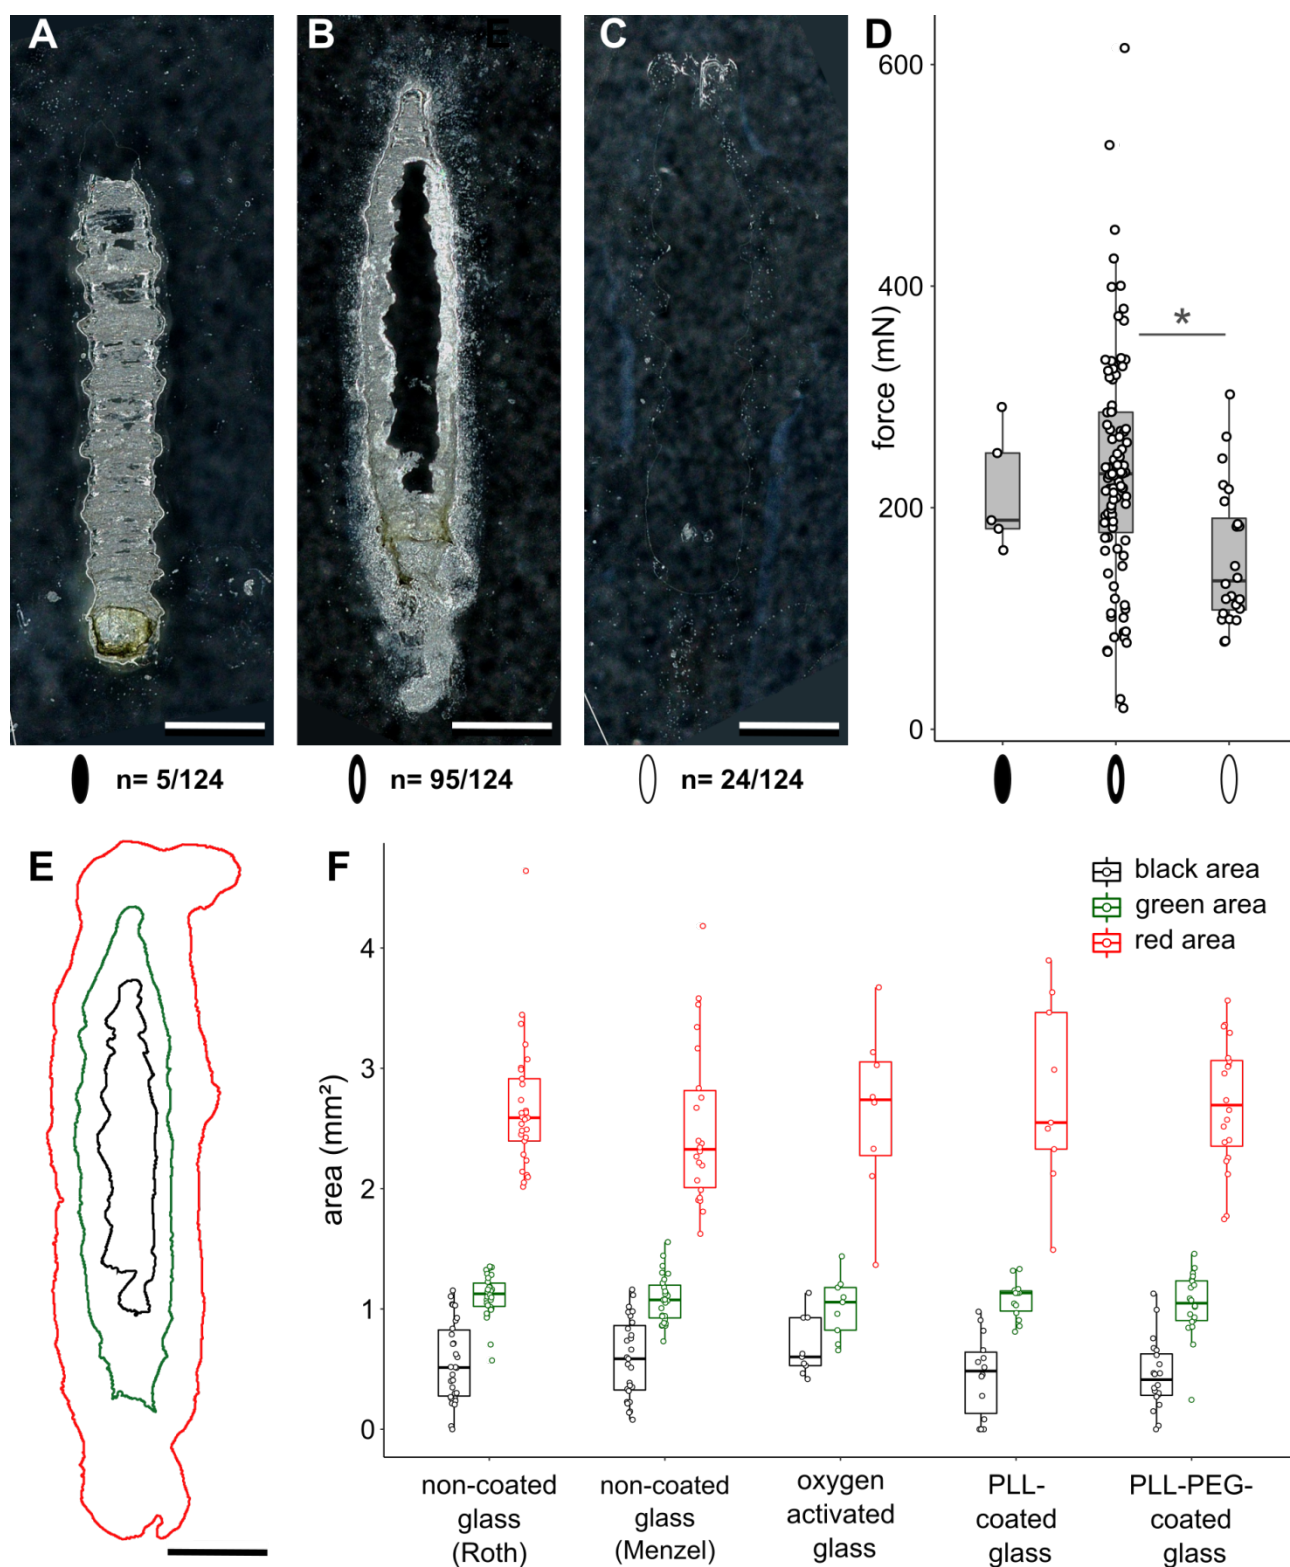

357

358 **Figure 5. Glue-substrate interface on glass-type substrates.** (A-C) Examples of typical glue  
 359 prints obtained after pull-off force assays on glass-type substrates: (A,C) PLL-coated glass, (B)  
 360 non-coated glass (Roth). Three cases are defined: (A) when the glue fully remained on the substrate,

361 represented as a black oval, **(B)** when the glue partly detached from the substrate, represented as a  
362 white oval with thick black contour, **(C)** when the glue completely went off from the substrate,  
363 represented as a white oval. **n** indicates the total number of glue prints obtained for each case. **(D)**  
364 Box plots representing the force required to detach pupae depending on the print types defined in  
365 **(A-C)**. One dot corresponds to a single pupa. Asterisk indicates significant difference ( $P < 0.05$ )  
366 between cases where the glue partly detached from the substrate and cases where the glue  
367 completely went off from the substrate. **(E)** Scheme of the various glue prints with the glue-pupa  
368 interface delimited in green, the glue-glass interface delimited in red and the border of the glue  
369 removed from the glass after pull-off adhesion test in black. **(F)** Box plots showing the size of the  
370 three areas defined in **(E)** for the five glass-substrates. Only prints where the glue fully remained  
371 and partly detached from the substrates were analyzed (see Methods). Scale bars: **(A-C,E)** 500  $\mu\text{m}$ .  
372 Box plots are defined as previously (Fig. 4).

373

374 After pull-off force measurements, glue prints were analyzed for the five glass-type substrates. For  
375 these substrates, three types of prints can be defined: (1) the glue fully remained on the substrate  
376 (Fig. 5A), (2) the glue partly detached from the substrate (Fig. 5B) or (3) the glue went off  
377 completely with the pupa (Fig. 5C). Most of the time, the glue was partly detached from the  
378 substrate ( $n = 95/124$ ). For the five glass-type substrates, print types (but not substrate types) have a  
379 significant impact on pupa adhesion (two-way ANOVA, print types:  $F = 5.6$ ,  $P = 0.0013$ ). When the  
380 glue completely went off with the pupa, corresponding pull-off force was significantly lower than  
381 force obtained when glue was partly detached (134 mN,  $SD = 62$  compared to 231 mN,  $SD = 102$ ,  
382 Tukey test  $P < 0.05$ ) (Fig. 5D). On Teflon, the glue always went off with the pupa ( $n = 33/33$ ).

383 Furthermore, from the glue print three distinct areas can be defined. The pupa-substrate  
384 interface area corresponds to the area where the pupa was in contact with the substrate (green  
385 outline in Fig. 5E). The glue-substrate interface area (red outline in Fig. 5E) corresponds to the total  
386 surface of the substrate covered by the glue. After pupa detachment, a third area where glue went  
387 away with the pupa can be defined (black outline in Fig. 5E). For all cases (as in Fig. 5A,B) where  
388 the glue did not go off completely with the pupa, the three areas were measured from the print  
389 images of the five glass-type substrates. A relatively high variation in glue-substrate interface area  
390 was observed (from 1.3 to 4.6  $\text{mm}^2$ ) compared to the pupa-substrate area which was relatively  
391 invariant, around 0.2 to 1.5  $\text{mm}^2$  (Fig. 5F). No difference was found in areas between substrates  
392 (one-way ANOVA for each area,  $P > 0.05$ ) (Fig. 5F). No correlation was found between pull-off

393 force and any of the three areas when combining the five substrates or when testing each substrate  
394 individually (linear regression for each area,  $P > 0.05$ ) (Fig. S1).

395

## 396 **DISCUSSION**

397 *Drosophila* glue spreads over an external substrate and sticks the pupa's ventral part to the  
398 substrate, forming an oval-shaped interface (Fig. 3B). From SEM images, we observed flat holes  
399 that seem to correspond to air bubbles that were trapped between different layers of glue. Several  
400 layers may have been deposited successively on the surface of the pupa by the back and forth  
401 movements of the larvae during expectoration (Fraenkel and Brookes, 1953). The presence of  
402 bubbles and the fact that the glue does not fill all the asperities of the cuticles suggest that the glue  
403 is relatively viscous when it comes out. It is known that the glue is produced by the salivary glands  
404 and is secreted by the mouth (Fraenkel and Brookes, 1953). However, on the glue prints we  
405 sometimes observed a plug around the posterior tip of the larva (Fig. 3B). Recently, Benova-  
406 Lizekova et al. (2019) reported that a few larvae did not empty their guts entirely before  
407 pupariation. One possibility is that this plug might be a posterior secretion from the digestive tube,  
408 which mixes with the anteriorly secreted glue.

409 During our pull-off force assays, the piece of tape used to stick the pupa in order to pull it  
410 peeled out from the pupal case in 153 of the 235 analysed cases, meaning that the adhesion strength  
411 between the double-sided tape and the pupal case is close to the adhesion strength between the glue  
412 and the pupa. In our experiments, the tape thus adheres to the pupal case just enough for pupa glue  
413 measurements. Furthermore, in 76/235 cases, the posterior part of the animal first detached from the  
414 substrate before the head detached. In these cases, the pull-off force was probably not applied  
415 exactly at the center of the pupa but more posteriorly due to the asymmetrical shape of the pupa.  
416 Glue concentration and quantity may also be higher around the mouth, from which it is secreted.  
417 Furthermore, the pupal case is more fragile around the puparial opercular seam, a seam which runs  
418 across the front of the puparium and extends along the sides, and which will break when the adult  
419 will hatch (Tyler, 1994). In addition, when using forceps to extract the animal from its pupal case,  
420 the pupal case generally splits into annular strips (Held, 1992). The zone of breakage that we  
421 observed on the pupal case in our pull-off assays therefore corresponds to the most fragile region of  
422 the pupal case.

423 In any case, no significant difference was found between cases for which pupae detached at  
424 once and cases where the posterior part detached before the head part. This suggests that stronger  
425 head adhesion does not affect the maximal pull-off force.



426 Pull-off forces required to detach pupae from substrates other than Teflon ranged from 151  
427 mN (P80, SD=20) to 269 mN (1MIC, SD=105). Using pupa-substrate interface (green outline in  
428 Fig. 5E) as a measure of contact area between the glue and the substrate, we found a median contact  
429 area of 1.10 mm<sup>2</sup>, which leads to an adhesive strength ranging from 137 to 244 kPa. Few similar  
430 studies have been carried on insect egg adhesive strength. Two of them reported higher values (1-2  
431 MPa for *Opodiphthera* eggs on wood (Li et al., 2008), 4.3-12.2 MPa for whitefly eggs on rose  
432 leaves (Voigt et al., 2019), one study found equivalent values (38.8-271.3 kPa for beetle *C.*  
433 *asparagi* on plant surface (Voigt and Gorb, 2010)) or another lower adhesive strength (13.9-97.8  
434 kPa for the moth *C. pomonella* eggs on fruits (Al Bitar et al., 2014)). To our knowledge, our study is  
435 the first one to report adhesion strength measurements for Diptera pupa.

436 No statistical differences in pull-off forces were found between the different substrates  
437 except for Teflon (median pull-off force is 42 mN, SD= 20), suggesting that the glue can stick to  
438 hydrophobic substrates as well as hydrophilic substrates. We can hypothesize that proteins of the  
439 glue are polarizable, which allows the glue to stick strongly to polarizable substrates that are  
440 differently charged and not to Teflon, which is not polarizable. Indeed, Sgs proteins are highly  
441 charged. They are mostly composed of positively charged amino acids and they are highly  
442 glycosylated with negatively charged sugars (Beckendorf and Kafatos, 1976; Korge, 1977).

443 No differences were found on resin substrates with different roughnesses. We expected that  
444 pull-off force would increase with roughness as contact area on rough substrate is bigger.  
445 Furthermore, we did not find correlation between force and contact area for any of the substrates  
446 used. Both observations can be explained by a possible critical crack initiation stress between the  
447 pupal case and the glue. Indeed, we observed on the glue prints on glass-type substrates that the  
448 glue from the pupa-substrate contact area is partly detached, suggesting that rupture occurs between  
449 the glue and the pupal case. A similar phenomenon may occur on resin substrates, whereas on  
450 Teflon the glue completely goes off from the substrate, suggesting that the rupture occurs between  
451 the glue and the Teflon. Thus, in all the tested substrates except Teflon, the bond between the glue  
452 and the different substrates appears to be stronger than the bond between the glue and the pupal  
453 case. It is thus possible that our adhesion tests measure the adhesive force of the bond between the  
454 glue and the pupal case, which would explain why we observed the same adhesion strength for all  
455 substrates except Teflon. As an alternative explanation for the same adhesiveness measured on all  
456 tested substrates except Teflon, it is possible that the animal modulates the amount of glue it  
457 produces, or the way it spreads the glue over the substrate and its body. It would be interesting to do  
458 adhesion measurement on isolated glue. However, it is challenging to collect the glue as it is

459 secreted in very small volume and it polymerizes within 3-5 min. after expectoration (Beňová-  
460 Liszeková et al., 2019).

461 Pull-off force values were rather variable between trials for a given substrate (for example  
462 from 19 to 451 mN on Menzel non-coated glass). Such a wide range of values could be due to  
463 individual variability. Pupae weight could not be deduced accurately by subtracting the final force  
464 from the initial force because pupal weight was within the noise of force values. However,  
465 individuals from the same population as the pupae used for trials were weighted instead. We found  
466 that pupal weight averaged  $1.4 \pm 0.3$  (SE) mg (n=24). The weight variation is negligible compared  
467 to the force variation observed within substrates. Surprisingly, considering this average weight and  
468 an average force of 217 mN (mean of all trials kept for analysis except trials on Teflon), the glue  
469 holds about 15 500 times the weight of a pupa.

470

## 471 **Conclusions**

472 For the first time, we report here measurements of *Drosophila* pupal adhesion strength. We  
473 present a pull-off force test to measure pupa adhesion which could be used in the future to explore  
474 pupa adhesion in various strains and species of flies. With the powerful genetic tools available in  
475 *Drosophila melanogaster*, we now plan to assess the adhesive function of the glue genes. The use of  
476 *D. melanogaster* as a model organism for the study of bioadhesives is very promising as it makes it  
477 possible and easy to manipulate the composition of the glue.

478

479

480

481

482

483

484

485

486

487

488

489

490

491

492 **Supplementary**

493 **Table S1. raw dataset: Borne\_2020\_glue\_table\_S1.csv**

494

495 **Table S2. Contact angle measurements (°) for the different substrates.** Contact angles were  
496 measured for each substrate. All the measurements were done before the pull-off force  
497 measurements except for PLL-PEG-coated glass.

498

| <b>substrate</b>                        | <b>mean</b> | <b>std error</b> |
|-----------------------------------------|-------------|------------------|
| <b>1MIC-resin</b>                       | 112.68      | 0.47             |
| <b>P1000-resin</b>                      | 109.19      | 0.89             |
| <b>P80-resin</b>                        | 103.27      | 1.29             |
| <b>teflon</b>                           | 96.64       | 1.88             |
| <b>smooth_resin</b>                     | 84.11       | 1.93             |
| <b>9MIC-resin</b>                       | 78.63       | 1.89             |
| <b>PLL-coated glass</b>                 | 55.15       | 1.28             |
| <b>PLL-PEG-coated glass</b>             | 38.65       | 1.06             |
| <b>oxygen-activated glass</b>           | 37.03       | 1.39             |
| <b>non-coated glass (Menzel)</b>        | 28.86       | 0.91             |
| <b>non-coated glass (Roth) unwashed</b> | 20.05       | 0.57             |
| <b>non-coated glass (Roth) washed</b>   | 11.84       | 1.40             |

499

500

501

502

503

504

505

506

507

508

509

510

511

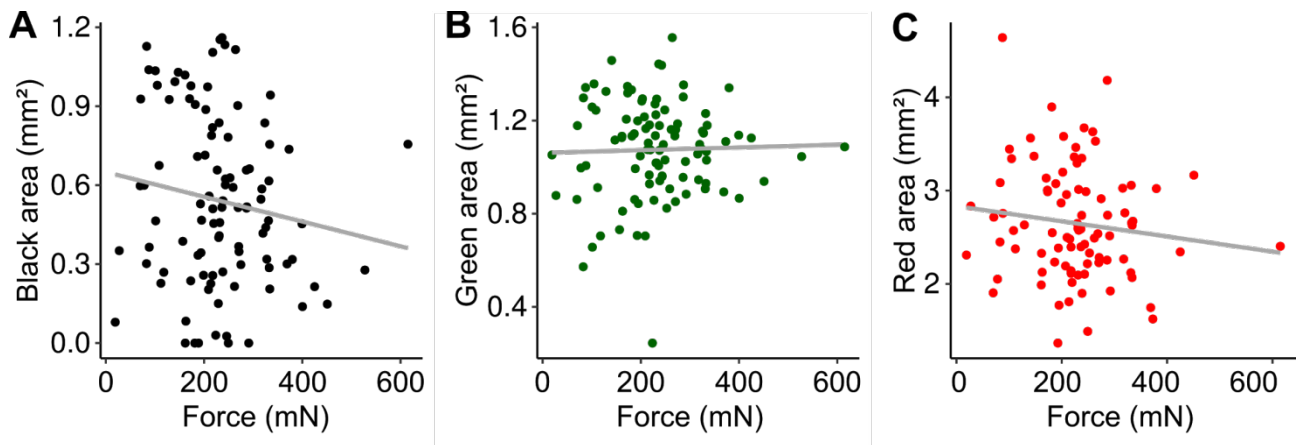

512

513 **Figure S1. Force in function of (A) black area, (B) green area and (C) red area.** Each dot  
514 represents one print on glass-type substrates. The grey lines represent the linear regressions: **(A)**  $r^2=$   
515  $0.01168$ ,  $y= 257.69 - 46.03x$ ,  $p=0.144$  ; **(B)**  $r^2= -0.009391$ ,  $y= 218.05 + 13.73x$ ,  $p=0.7793$  ; **(C)**  $r^2=$   
516  $0.004791$ ,  $y= 279.36 - 19.97x$ ,  $p= 0.2369$ ; where  $r^2$  is the adjusted  $r^2$ .

517

### 518 **Acknowledgements**

519 We acknowledge T. Roeder and C. Sandberg (Kiel University, Germany) for help with fly culture,  
520 S. De Beco (Université de Paris, Paris) for help with PLL-PEG coating and L. Corté (Mines-  
521 ParisTech, ESPCI, Paris) for discussions.

522

### 523 **Funding**

524 The research leading to this paper has received funding from the European Research Council under  
525 the European Community's Seventh Framework Program (FP7/2007–2013 Grant Agreement no.  
526 337579) to VCO. FB was supported by a PhD fellowship from ENS Paris Saclay and by a travel  
527 grant from COST ENBA CA-15216. SG was supported by the German Science Foundation (project  
528 GO 995/38-1).

529

530

531

532

533

534

535

536

537

20

## 538 **References**

- 539 Al Bitar, L., Gorb, S.N., Zebitz, C.P.W., and Voigt, D., 2012. Egg adhesion of the codling  
540 moth *Cydia pomonella* L. (Lepidoptera, Tortricidae) to various substrates: I. Leaf surfaces of  
541 different apple cultivars. *Arthropod-Plant Interact.* 603: 471-488.
- 542 Al Bitar, L., Gorb, S.N., Zebitz, C.P.W., Voigt, D., 2014. Egg adhesion of the codling moth *Cydia*  
543 *pomonella* L. (Lepidoptera, Tortricidae) to various substrates: II. Fruit surfaces of different  
544 apple cultivars. *Arthropod-Plant Interact.* 8, 57–77.
- 545 Beckendorf, S.K., Kafatos, F.C., 1976. Differentiation in the salivary glands of *Drosophila*  
546 *melanogaster*: Characterization of the glue proteins and their developmental appearance.  
547 *Cell.* 9, 365–373.
- 548 Beltramí, M., Medina-Muñoz, M.C., Arce, D., Godoy-Herrera, R., 2010. *Drosophila* pupation  
549 behavior in the wild. *Evol. Ecol.* 24, 347–358.
- 550 Beňová-Liszeková, D., Beňo, M., Farkaš, R., 2019. Fine infrastructure of released and solidified  
551 *Drosophila* larval salivary secretory glue using SEM. *Bioinspir. Biomim.* 14, 055002.
- 552 Betz, O., 2010. Adhesive exocrine glands in insects: Morphology, ultrastructure, and adhesive  
553 secretion, in: von Byern, J., Grunwald, I. (Eds.), *Biological Adhesive Systems: From Nature*  
554 *to Technical and Medical Application*. Springer, Vienna, pp. 111–152.
- 555 Da Lage, J.-L., Thomas, G.W.C., Bonneau, M., Courtier-Orgogozo, V., 2019. Evolution of salivary  
556 glue genes in *Drosophila* species. *BMC Evol. Biol.* 19, 36.
- 557 Farkaš, R., 2016. The complex secretions of the salivary glands of *Drosophila melanogaster*, A  
558 model System, in: Cohen, E., Moussian, B. (Eds.), *Extracellular composite matrices in*  
559 *Arthropods*. Springer International Publishing, Cham, pp. 557–600.
- 560 Fraenkel, G., Brookes, V.J., 1953. The process by which the puparia of many species of flies  
561 become fixed to a substrate. *Biol. Bull.* 105, 442–449.
- 562 Gorb, S. N. (2001) *Attachment Devices of Insect Cuticle*. Dordrecht, Boston, London: Kluwer  
563 Academic Publishers. p 305.
- 564 Graham, L., 2008. Biological Adhesives from Nature, in: Wnek, G., Bowlin, G. (Eds.),  
565 *Encyclopedia of Biomaterials and Biomedical Engineering, Second Edition - Four Volume*  
566 *Set*. CRC Press, pp. 236–253.
- 567 Grossfield, J., 1978. Non-sexual behavior of *Drosophila*, in: *The Genetics and Biology of*  
568 *Drosophila*. pp. 1–126.
- 569 Held, L.I., 1992. Pupal development outside the pupal case. *DIS* 71, 204.
- 570 Korge, G., 1977. Larval saliva in *Drosophila melanogaster*: Production, composition, and

- 571 relationship to chromosome puffs. *Dev. Biol.* 58, 339–355.
- 572 Korge, G., 1975. Chromosome puff activity and protein synthesis in larval salivary glands of  
573 *Drosophila melanogaster*. *Proc. Natl. Acad. Sci. USA* 72, 4550–4554.
- 574 Kress, H., 1982. Biochemical and ontogenetic aspects of glycoprotein synthesis in *Drosophila*  
575 *virilis* salivary glands. *Dev. Biol.* 93, 231–239.
- 576 Lee, B.P., Messersmith, P.B., Israelachvili, J.N., Waite, J.H., 2011. Mussel-inspired adhesives and  
577 coatings. *Annu. Rev. Mater. Res.* 41, 99–132.
- 578 Li, D., Huson, M.G., Graham, L.D., 2008. Proteinaceous adhesive secretions from insects, and in  
579 particular the egg attachment glue of *Opodiphthera* sp. moths. *Arch. Insect Biochem.*  
580 *Physiol.* 69, 85–105
- 581 Pino, F.D., Jara, C., Pino, L., Godoy-Herrera, R., 2014. The neuro-ecology of *Drosophila*  
582 pupation behavior. *PLOS ONE*. 9, e102159.
- 583 Ramesh, S.R., Kalisch, W.-E., 1988. Glue proteins in *Drosophila nasuta*. *Biochem. Genet.* 26, 527–  
584 541.
- 585 Salerno, G., Reborá, M., Gorb, E., Gorb, S., 2018. Attachment ability of the polyphagous bug  
586 *Nezara viridula* (Heteroptera: Pentatomidae) to different host plant surfaces. *Sci Rep* 8,  
587 10975.
- 588 Shirk, P.D., Roberts, P.A., Harn, C.H., 1988. Synthesis and secretion of salivary gland proteins in  
589 *Drosophila gibberosa* during larval and prepupal development. *Roux's Arch. Dev. Biol.* 197,  
590 66–74.
- 591 Sokolowski, M.B., 1985. Genetics and ecology of *Drosophila melanogaster* larval foraging and  
592 pupation behaviour. *J. Insect Physiol.* 31, 857–864.
- 593 Spurr, A.R., 1969. A low-viscosity epoxy resin embedding medium for electron microscopy. *J.*  
594 *Ultrastruct. Res.* 26, 31–43.
- 595 Team, R.C., 2013. R: A language and environment for statistical computing.
- 596 Tyler, M.S., 1994. Development of the fruit fly, in: *Developmental Biology: A Guide for*  
597 *Experimental Study*. Sinauer Associates Massachusetts, pp. 85–106.
- 598 Vandal, N.B., Siddalingamurthy, G.S., Shivanna, N., 2008. Larval pupation site preference on fruit  
599 in different species of *Drosophila*. *Entomol. Res.* 38, 188–194.
- 600 Voigt, D., Gorb, S., 2010. Egg attachment of the asparagus beetle *Crioceris asparagi* to the  
601 crystalline waxy surface of *Asparagus officinalis*. *Proc. R. Soc. B Biol. Sci.* 277, 895–903.
- 602 Voigt, D., Schrameyer, K., Kiefer, J., Zebitz, C.P.W., Gorb, S., 2019. Anchoring of greenhouse  
603 whitefly eggs on different rose cultivars. *Arthropod-Plant Interact.* 13, 335–348.

604 Vouldibio, J., Capy, P., Defaye, D., Pla, E., Sandrin, J., Csink, A., David, J.R., 1989. Short-range  
605 genetic structure of *Drosophila melanogaster* populations in an Afrotropical urban area and  
606 its significance. Proc. Natl. Acad. Sci. USA 86, 8442–8446.  
607
